# Supplementary material for: Loss of the extracellular matrix protein Perlecan disrupts axonal and synaptic stability during Drosophila development
Source: eLife. 2023 Jun 27;12:RP88273. doi: 10.7554/eLife.88273 (PMC10328508; doi:10.7554/eLife.88273)
Supplement: Figure 1—figure supplement 1—source data 1. [file elife-88273-fig1-figsupp1-data1.xlsx]

## Sheet: Figure 1S1B
Number of boutons		Descriptive statistics			Unpaired t test
Control	trolGFP		Control	trolGFP
24	30	Number of values	14	12	Table Analyzed	#Ib Hrp/GluR3+ boutons
31	29
26	30	Minimum	22	16	Column B	trolGFP
27	23	25% Percentile	24.75	26.5	vs.	vs.
36	28	Median	26	29	Column A	Control
35	16	75% Percentile	31.25	29.75
27	28	Maximum	36	33	Unpaired t test
22	29				P value	0.9673
25	33	Mean	27.43	27.5	P value summary	ns
26	29	Std. Deviation	4.415	4.338	Significantly different (P < 0.05)?	No
22	29	Std. Error of Mean	1.18	1.252	One- or two-tailed P value?	Two-tailed
25	26				t, df	t=0.04145, df=24
32		Lower 95% CI	24.88	24.74
26		Upper 95% CI	29.98	30.26	How big is the difference?
					Mean of column A	27.43
					Mean of column B	27.5
					Difference between means (B - A) ± SEM	0.07143 ± 1.723
					95% confidence interval	-3.485 to 3.628
					R squared (eta squared)	7.16e-05
					F test to compare variances
					F, DFn, Dfd	1.036, 13, 11
					P value	0.9654
					P value summary	ns
					Significantly different (P < 0.05)?	No
					Data analyzed
					Sample size, column A	14
					Sample size, column B	12
