# Supplementary material for: Loss of the extracellular matrix protein Perlecan disrupts axonal and synaptic stability during Drosophila development
Source: eLife. 2023 Jun 27;12:RP88273. doi: 10.7554/eLife.88273 (PMC10328508; doi:10.7554/eLife.88273)
Supplement: Figure 1—source data 1. [file elife-88273-fig1-data1.xlsx]

## Sheet: Figure 1E
Line profiles through axons
mm	Control Pcan														trol RNAi Pcan
0	30	31	99	33	28.14	23	24	16	12	17	31	38	21	13	0	0	1	0	0	0	0	0	0	0	0	1	2	0	0	0	0	0	0
0.198	29.1	36	90	47	35.46	36	22.52	15.31	14	29.47	38.34	32.61	17	13.68	0	0	0.479	0	0	0	0	0	0	0	0.496	1	2	0	0	0	0	0	0
0.397	49.15	38	78	48	45.77	31	26.14	15.36	16.61	77.06	63.25	30.96	13	14.83	0	0	0	0	0	0	0	0	0	0	0.84	1.09	2.28	0	0	0	0	0	0
0.595	78.95	49	98	46	57.6	29	28.97	13.5	19.56	93.59	101.31	30.65	14	17.47	0	0	0	0	1	0	0	0	0	0	0.0182	1	5.85	0	0	0	1	0	0
0.794	87.66	83	164	64	70.08	32	30.78	13.78	38.25	96.82	152.11	33.64	14	18.97	0	0	0.449	0	0	0	0	0	0	0	0	1.19	6.38	0	0	0.0355	0	0	0
0.992	97.13	101	149	91	81.7	58	35.09	23.79	74.04	91.88	158.21	46.13	16	16.95	0	0	1.45	0	0	0	0	0	0	0	0	2.23	7.23	0	0	0.445	0	0	0
1.19	111.99	105	126	101	90.94	85	73.69	36.98	61.37	80.62	176.56	77.37	26	19.35	0	0	1	0	0	0	0	0	0	0	0	3	7.43	0.284	0	0	0	0	0
1.39	97	90	116	78	92.4	104	106.29	49.7	64.31	79.99	194.4	94.66	58	43.27	0	0	1	0	1	0	0	0.326	0	0	0	2.34	8.66	0.664	0	0	1	0	0
1.59	78.5	101	113	72	91.83	100	106.71	52.54	60.18	82.5	199.66	87.8	101	91.86	0	0	1	0	0	0	0	0.443	0	0	0	2.76	9.85	0.0056	0	0	0	0	0
1.79	79.7	98	114	66	88.28	94	103.33	50.07	63.97	83.78	186.62	89.39	85	87.11	0	0	0.791	0	1	0	0	0	0	0	0	3.85	6.6	0	0	0	0	0	0.424
1.98	80.01	93	116	75	83.52	95	85.86	48.64	75.81	82.38	171.79	90.56	73	71.67	0	0	1.11	0	0	0.133	0	0	0	0	0.308	4	6.95	0	0	0.1	0	0	0.476
2.18	76.61	98	114	100	79.01	63	71.75	50.83	57.71	90.35	162.74	86.26	80	69.31	0.471	0	1.45	0	0	0.774	1	0	0	0	0.722	3.06	4.04	0	0	0	0	0	0.0065
2.38	76.33	99	123	116	76.33	65	71.26	53.44	62.92	82.1	166.96	87.37	94	63.69	0.429	0	0.761	0	0	0.988	0	0.845	1	0	0	3.43	4.99	0	0	0	0	0	0
2.58	77.03	118	112	150	75.44	56	79.34	58.68	59.49	82.98	149.58	85.21	125	70.76	0.0056	1	0.113	0	0	0.515	1	0.251	0	1	0	3.01	5.61	0	0	0	0	0	0
2.78	77.86	143	114	181	76.69	55	71.29	70.7	59.32	87.87	147.88	84.06	105	58.59	0.655	1	0.678	0	0	0	0	0	0	0	0.117	3.33	4.68	0	0	0	0	0	0
2.98	94.2	132	146	193	79.33	67	45.4	68.76	47.51	82.19	159.03	53.82	27	23.6	0.995	0	0.0358	0	1	0	0	0.187	0	0	0.624	4.41	5.7	0.702	0	0	0	0	0
3.18	88.3	67	135	183	78.87	77	35.82	61.25	30.13	78.05	175.02	32.31	21	12.05	0.253	0	0	0	0	0	1	0	0	0	0	4.76	4.03	0.248	0	0	0	0	0
3.37	64.08	49	114	151	74.28	59	28.87	43.45	19.11	100.31	195.69	24.23	31	14.11	0.00368	0	0	1	0	0.0175	0	0	0	0	0	2.05	4	0.00367	0	0	0	0	0
3.57	39.39	39	79	130	67.08	20	24.24	48.4	16.89	119.54	162.06	21.62	47	14.53	0	0	0	0	1	0.0531	0	0	0	1	0	2.84	4	0	0	0	0	0	0
3.77	25.6	38	72	92	59.03	18	20.62	34.82	13.97	86.87	95.89	23.85	32	21.94	0	0	0	0	1	0	0	0	0	2	0	2.02	4.98	0	0	0	0	0	0
3.97	19.95	47	69	62	47.96	25	24.38	23.89	13.76	61.76	56.73	25.08	25	37.25	0	1	0	0	2	0	0	0	0	2	0	1.95	4.07	0.0474	0	0	0	0	0
4.17	22.69	53	53	53	36.37	22	27.64	18.89	10.1	32.68	45.62	19.65	21	33.97	0	2	0	0	0	0	0	0	0	2	0	0.0486	4	0.976	0	0	1	0	0
4.19	23	53	53	53	33.63	22	28	18	10	32	45	19	21	31	0	2	0	0	0	0	0	0	0	2	0	0	4	1	0	0	1	0	0

## Sheet: Figure 1F
Line profiles through axons
mm	Control Hrp														trol RNAi Hrp
0	4	2	4	3	4.28	2	3	3	8	4	5	4	3	3	4	4	7	1	2	2	12	5	2	3	2	3	19	3	7	1	5	3	12
0.198	4.82	5	5	5	4.86	4	3.3	4.58	7.14	2.71	7.66	3.96	2	4.34	4	4	8.67	3	3	2.31	9	6.5	4	4	2.07	2.05	13.34	3.9	3	2.26	3	3	18.56
0.397	8.55	2	4	6	5.23	5	2.76	2.75	13.98	4.22	8.34	3.66	4	3.2	3.1	3	5.86	3	1	2.07	2	8.47	3	4	2.31	4.9	17.37	2.57	3	2.72	4	2	14.1
0.595	18.47	4	7	4	5.68	6	2.93	2.02	16.56	6.03	12.29	5.19	2	1.29	5.71	4	4.76	3	3	2.01	2	8.4	4	3	2.76	2.15	22.84	5.13	5	2.61	4	4	10.87
0.794	23.85	5	18	6	6.89	6	3.73	3.07	44.59	10.06	24.61	5.64	3	3.27	4.39	7	6.42	3	3	4.05	2	12.05	2	4	3.09	4.8	27.93	6.19	6	2.82	4	3	15.27
0.992	27.96	18	18	14	8.83	7	5.59	5.61	70.1	17.66	30.14	6.96	2	3.17	3.95	8	11.62	5	4	4.83	5	18.7	3	3	3.21	5.76	35.77	9.51	11	6.05	6	2	17.98
1.19	26.9	46	26	13	10.94	15	11.57	9.98	79.5	23.95	53.48	17.6	5	3.54	6.55	20	22.97	17	4	3	6	33.58	8	7	6.47	7.98	38.83	16.38	16	5.68	10	2	22.26
1.39	28.7	46	27	28	13.11	43	23.98	12.75	69.74	26.02	59.65	34.76	14	6.31	11.95	16	32.78	28	9	4.59	15	58.87	7	6	6.05	8.33	28.41	22.29	13	6.26	18	5	28.62
1.59	33.19	31	17	22	14.98	32	33.38	13.35	69.96	26.98	45.82	46.15	27	11.18	16.77	23	33.95	30	12	4.87	15	76.8	10	17	8.05	14.7	29.04	39.04	14	12.22	23	15	27.29
1.79	31.64	34	42	20	16.69	18	32.5	13.66	75.8	29.86	43.65	37.46	39	26.04	27.75	27	26.01	34	8	5.97	17	81.72	29	22	16.97	11.46	24.19	71.67	24	16.2	21	23	27.86
1.98	33.42	35	16	29	18.16	28	30.93	18.54	42.32	23.73	41.85	37.02	47	27.64	34.02	32	28.81	28	6	8.23	14	87.29	52	16	27.21	16.7	27.96	58.95	23	15.65	19	13	29.02
2.18	32	43	25	23	19.34	19	30.23	19.65	31.61	28.4	45.22	35.8	33	29.11	27.04	38	33	21	6	11.97	9	88.45	51	19	34.47	13.66	34.35	23.24	19	17.78	26	17	32.72
2.38	38.27	45	30	18	18.11	22	32.37	25.37	21.29	22.7	42.54	29.02	24	22.07	22.92	51	32.29	29	11	17.43	11	82.05	65	18	21.77	14.28	30.06	20.74	21	16.49	21	12	25.95
2.58	54.93	33	24	36	16.36	29	25.45	30.63	15.89	20.38	46.94	28.09	16	24.36	23.74	40	21.91	34	9	16.06	11	65.95	52	16	11.68	14.47	31.18	16.21	28	20.45	27	14	29.51
2.78	36.52	27	27	25	14.89	11	9.73	26.84	11.08	18.35	46.64	25.21	11	9.17	16.78	15	10.1	17	3	9.52	8	37.07	44	7	4.91	14.67	36.26	13.05	31	19.24	19	15	25.4
2.98	21.12	15	7	10	13.45	5	6.08	15.95	6.36	24.51	42.52	19.01	6	3.97	8.57	9	3.63	7	4	4.26	4	23.89	23	5	3.3	6.29	35.01	14.13	15	10.27	9	9	14.76
3.18	11.01	10	5	9	11.59	5	5.12	6.16	3.95	26.74	27.7	8.71	2	3.47	7.3	8	4.48	3	5	5.03	2	12.61	7	6	3.01	3.52	33.51	14.23	11	5.5	6	4	11.62
3.37	4.54	5	5	12	8.93	5	5.13	4.89	4.55	21.82	16.27	3.76	2	2.45	6.82	3	2.76	2	3	3.94	2	8.47	4	4	2.61	4.41	35.64	4.76	6	4.64	4	4	16.57
3.57	4.3	8	4	6	6.58	3	2.81	2.97	4.99	14.53	11.18	3.5	4	2.47	4.34	6	1.92	4	3	2.96	2	4.75	2	5	1.84	2.75	39.91	5.13	7	3.9	7	3	12.09
3.77	4.78	4	3	4	5.18	2	4.53	3.73	2.16	9.94	6.13	4.52	3	2.5	4.1	7	2.68	2	2	3.02	3	5.83	5	3	2.46	3.88	46.31	3.33	3	2.46	5	4	5.63
3.97	3.44	2	4	5	4	3	3.43	1.83	2.93	5.84	5.57	3.01	3	3.37	4.98	3	2	2	2	3	1	4.92	7	3	4.8	2.97	31.51	4.91	6	3.65	4	3	5.89
4.17	3.12	4	5	6	3.46	4	2.04	2.04	3.97	5.01	4.07	2.17	2	3.46	4.02	5	2	1	2	3.72	3	3.06	9	7	5.37	3	25.14	2.07	3	3.14	6	6	12.83
4.19	3	4	5	6	3.43	4	2	2	4	5	4	2	2	3	4	5	2	1	2	4	3	3	9	7	6	3	25	2	3	3	6	6	13

## Sheet: Figure 1H
Line profiles through boutons
mm	Control Pcan														trol RNAi Pcan
0	18	50	30	20	16.62	22	31	20	22	17	22	23	14	14	0	0	1	1	0	0	2	0	0	0	0	0	0	0	1	4	0	0	0	0	0	0
0.198	20	41.08	39.52	22.82	17.29	23.16	31.69	20.35	20.63	17.79	21	23.09	16	16.43	0	0	0.0836	0.0836	0	0.818	3	0	0	0.869	0	0	0.462	0	1.13	4	0.273	0	0	0	0	0
0.397	23	36.61	46.61	27.16	18.23	27.35	32.54	21.25	26.88	21.14	33	27.72	18	15.63	0	0	0	0	0	0.405	2	0	0	0.0116	0	0	0.299	0	1.8	1	0.531	0	0	0	0	0
0.595	30	33.26	44.35	22.93	19.44	30.8	25.28	26.83	24.14	22.47	47	43.38	21	20.14	0	0	0	0	0	0.397	2	0	0	0	0	0	0.167	0	2.96	2	0.703	0	0	0	0	0
0.794	35	30.75	36.04	25.76	20.36	31.38	22.3	29.09	19.28	17.63	27	47.84	26	23.92	0	0	0.0269	0	0	0	1	0	0	0.969	0	0	0.403	0	3.8	1	0.036	0	0	0	0	0
0.992	38	30.23	26.21	25.26	21.3	28.43	28.41	29.03	18.98	18.53	17	34.12	26	27.06	0	0	0	0	0	0.0109	1	0	0	2.92	0	0.26	0.314	0	4.13	2	0.687	0	0	0	0	0
1.19	28	36.08	24.55	25.01	22.05	26.08	42.3	24.06	19.67	18.03	16	28.4	21	31.28	0	0	0	0	0	0	1	1	0	3.47	0	0.546	0.667	0	4.3	3	0.0572	0	0	0	0	0
1.39	32	49.26	23.5	23.22	22.97	24.02	46.43	22.75	22.62	21.7	23	31.8	22	33.74	0	0	0	0	0	0	0	0	0	1.02	0	0	0.748	0.0739	5.29	5	0	0	0	0	0	0
1.59	46	55.81	20.39	19.8	23.76	25.4	39.85	23.96	27.24	20.48	27	24.74	31	27.82	0	0	0	0.0183	0	0.215	0	0	0	0.0613	0	0	0.193	0.0226	4.92	7	0	0	0	1	0	0.334
1.79	51	39.93	20.79	21.07	24.11	27.88	29.81	26.74	30.04	19.13	31	24.62	31	19.7	0	0	0	0.703	0	0.36	0	2	0	0.108	0	0	0.969	0	1.84	7	0	0	0	0	0	0.103
1.98	37	31.82	20.32	20.06	24.76	25.33	25.19	26.93	22.93	19.33	28	23.73	28	13.77	0	0	0.373	0.195	0	0.822	1	1	0	0.462	0	0	1.45	0.401	1.41	3	0.805	0	0	0	0	0.481
2.18	25	30	24.37	20.12	26.27	23.52	23.77	21.01	25.52	16.46	32	26.11	21	13.63	0.616	0.285	0	0.0317	1	0.00409	4	1	0	0.395	1	0.386	0.914	0.908	2.53	4	0.566	0	0	0	0	0.331
2.38	22	26.24	24.48	20.43	26.68	19.59	26.27	20.66	20.94	15.02	34	23.24	18	16.25	1.68	1	0.189	0.718	1	0	8	1	0	0.953	1	0.229	0.99	0.27	2.35	2	0.771	1	0	1	0	0
2.58	26	29.15	24.73	18.01	26.47	17.4	30.48	26.35	18.21	15.46	23	26.27	16	16.36	1	1	0.954	0.655	0	0.304	6	1	0	0.651	0	0.784	1	0	2.07	2	0.639	1	0	0	0.0284	0.369
2.78	27	31.72	23.88	18.65	26.68	18.39	33.46	30.38	22.36	14.11	21	25.37	16	20.48	0.806	1	0.279	0.00334	1	0.519	4	1	0	0.0796	1	0.367	1	0	1.52	3	0	0	0	0	0	0.475
2.98	34	28.59	20.71	14.3	26.43	23.81	32.59	39.8	27.59	13.5	25	23.57	15	28.41	0.136	0.823	0.486	0.819	0	0.169	2	0	0	0	1	0	0.353	0	2.02	3	0	1	0	0	0	0
3.18	36	26.93	18.02	16.3	25.19	40.19	27.53	59.11	28.32	12.61	28	26.14	15	25.84	0.921	0.323	1	0.531	1	0.81	2	0	0	0.0136	0	0	0.274	0	2.41	3	0	0	0	1	0	0
3.37	43	26.69	20.94	16.38	22.98	49.76	22.14	61.45	33.63	16.17	27	30.55	18	23.47	0.0146	0.874	1	0.0161	0	0.924	0	0	0	0	0	0	0.855	0	3.08	3	0	0	1	0	0	0
3.57	36	36.06	26.98	16.87	21.45	41.93	23.34	35.19	38.96	21.82	24	43.82	20	14.52	0.945	0.808	1	0.783	0	0.538	1	0	0	0.2	0	0	0.0229	0.173	3.03	3	0	0	1	0	0.254	0
3.77	43	37	26.58	19.09	19.79	36.49	28.44	22.32	29.93	24.68	23	36.21	19	13.42	0.646	0	1.57	1	0	0.431	1	1	0	0.0523	1	0	0.912	1.51	2.33	5	0.121	0	0	0	0.139	0
3.97	37	36.97	25.39	17.76	18.09	36.44	36.34	20.86	19.99	24.05	21	28.55	17	11.52	0.576	0.0956	2.28	1	0	0	0	0	0	0	0	0	0.359	1.22	1.31	4	0.593	0	0	0	0.38	0.165
4.17	28	37.8	27.22	18.13	17.17	34.73	41.27	20.59	21.2	20.5	20	26.48	16	10.48	0.796	0.95	1.08	0.454	1	0	1	1	0	0.331	0	0.579	0	0.614	1.29	2	0	0	0	1	0.899	0.551
4.37	22	36.82	27.89	17.87	16.83	28.93	36.12	23.31	19.03	20.43	20	25.49	17	12.96	0.738	0.582	1.59	0	0	0	0	1	0	0.0461	0	0.971	0.305	0.209	1	5	0	1	0	1	0.582	0.246
4.56	23	33	28.66	19.75	17.4	29.75	30.12	21.3	16.6	22.56	24	28.82	17	15.54	0.1	0.0216	0.161	0	0	0	0	1	0	0	0	0.458	0.896	0	1	3	0	0	0	0	0.0634	0
4.76	21	38.42	28.98	24.99	19	31.53	28.26	19.45	17.36	24.8	23	40.47	17	28.88	0	0	0.377	0.272	0	0	0	1	0	0	0	0	0.021	0	1.05	5	0.164	0	0	0	0	0
4.96	22	48.75	31.32	22.52	22.35	38.3	31.9	18.5	20.05	22.29	17	26.14	15	39.66	0	0	1.01	0	0	0.215	1	0	0	0	0	0	0.106	0	3.45	5	1	0	0	0	0	0
5.16	32	43.02	28.82	18.98	25.31	38.29	35.36	16.12	24.01	24.22	20	21.47	19	35.64	0	0	1.66	0	0	0	0	0	0.237	0	0	0	0.267	0	4	4	1	0	0	0	0.383	0
5.36	35	38.71	23.7	16.81	27.74	27.8	26.94	17.89	22.79	29.8	27	20.64	26	26.12	0	0.00099	1.33	0.427	0	0	0	0	0	0	0	0	0.522	0	2.98	4	0.326	0	0	0	0	0
5.56	31	31.59	25.7	16.58	28.77	24.55	19.07	17.51	21.29	27.13	28	18.44	23	30.28	0	0.496	0.991	0	0	0	0	0	0	0	1	0	0	0	1.75	3	0	0	0	0	0	0
5.76	27	30.76	23.57	17.55	28.94	31.09	18.84	21.71	18.21	24.49	34	19.51	21	33.39	0.231	0.201	0.276	0	0	0	0	0	0	0	0	0	0.119	0.341	1	3	0	0	0	0	0.799	0
5.95	21	40.83	21.06	16.91	27.35	29.79	18.01	26.33	20.87	23.81	28	23.5	22	21.45	0.704	0	0.296	0	0	0	0	0	0	0	0	0	0.346	0.133	1.06	3	0	0	0	0	0.357	0
6.15	24	42.79	18.48	17.13	25.41	26.73	18.95	27.97	31.47	21.17	27	27.32	25	17.53	0	0	0.984	0	0	0	0	0	0	0	0	0	0	0	1	3	0.692	0	0	0	0.0444	0
6.35	24	36.34	17.49	19.01	24.25	26.78	17.25	27.24	31.22	20.53	22	25.12	23	14.73	0	0	0.711	0	0	0	1	0	0	0	0	0.222	0	0.0367	1.18	3	0.208	0	0	0	0	0
6.55	25	32	17	21	24.27	25	17	25.03	20	21	18	24	30	13	0	0	1	0	0	0	1	0	0	0	0	0	0	0	1	2	0	0	0	0	0	0

## Sheet: Figure 1I
Line profiles through boutons
mm	Control Hrp														trol RNAi Hrp
0	4	3	4	8	12.44	7	3	9	3	2	2	10	4	5	6	6	3	2	2	1	3	5	2	24	8	2	12	2	4	1	1	7	1	3	3	3
0.198	5	4.41	5.21	9.48	11.52	7.27	3.71	13.06	1.53	4.41	4	6.05	3	3.71	4.1	3.69	3.07	3.63	2	2.51	3	4	1.29	30.95	6	2.91	9.87	4.51	5.67	3	1.45	4	0	3	3.41	6.54
0.397	9	3.97	4.12	7.08	10.96	5.22	4.08	18.09	1.98	4.44	3	6.63	4	7.28	3.12	2.91	3.56	3.9	1	1.31	5	4	1.49	27.8	3	2.69	8.05	4	5.68	5	2.04	4	0	4	2.38	8.4
0.595	7	4.58	4.62	4.09	10.16	2.44	5.24	19.79	3.74	4.39	3	6.36	3	5.34	2.17	3.3	2.93	4.1	1	1.58	3	4	1.43	28.29	5	3.61	5.34	2.59	5.46	3	2.33	5	1	2	4.49	8
0.794	6	4.56	2.38	4.66	9.86	3.93	6.85	21.48	3.23	7.86	4	8.49	2	5.09	2.26	3.48	3.2	6.07	1	2.14	4	9	1.57	25.08	6	3.18	6.22	3.11	5.29	6	1.97	3	1	4	4.69	8.04
0.992	5	4.31	5.32	4.28	10.11	7.19	6.9	18.81	5.24	9.11	7	8.25	4	4.42	2.89	3.46	2.14	5.55	2	1.31	5	7	2.03	25.67	2	4.3	6.34	2.68	4.04	5	3.81	8	1	4	3.54	5.78
1.19	7	5.19	5.84	5.05	11.36	9.19	10.66	29.22	7.16	9.99	6	10.7	8	5.31	3.97	3.89	3.03	3.95	2	2.98	5	8	2.37	22.21	6	4.15	6.32	3.8	7.48	4	2.68	5	4	4	3.26	6.39
1.39	9	6.54	8.29	11.36	15.82	10.26	20.23	27.99	8.94	6.16	7	15.65	9	6.53	4.61	3.37	4.76	5.19	2	6.51	5	12	2.1	21.5	8	4.28	10.18	3.31	13.86	3	2.5	9	2	6	5.24	6.95
1.59	10	10.05	16.17	23.03	24.68	17.82	25.89	24.04	13.53	10.21	7	24.7	12	9.47	6.12	7.72	5.44	6.05	3	6.3	3	15	3.76	21.07	9	9.05	18.58	7.11	23.27	6	2.27	10	5	7	9.68	8.33
1.79	19	20.44	33.11	47.81	35.79	30.91	24.33	25.97	21.63	12.75	6	36.43	22	13.91	8.98	10.71	8.66	8.11	7	11.36	6	17	6.68	20.21	18	16.12	29.84	14.07	30.37	13	2.87	13	7	23	11.56	11.33
1.98	26	57.92	57.44	72.42	47	46.71	22.79	48.33	26.83	17.71	9	49.19	57	25.15	19.01	22.59	12.32	13.3	10	18.73	14	34	11.71	24.96	30	29.42	44.85	33.98	37.74	22	5.96	18	11	27	27.24	21.36
2.18	49	75.57	81	77.5	57.04	48.51	39.79	85.09	58.93	38.69	42	58.81	94	46.52	37.1	35	20.61	20.71	12	22.33	27	22	8.28	24.17	50	41.6	52.97	40.7	44.97	46	12.83	49	10	25	47.71	32.99
2.38	64	60.18	83.29	56.59	63.82	49.03	61.94	107.16	87.36	41.75	68	65.28	66	66.31	46.31	50.99	40.08	39.05	23	18.03	45	22	9.69	32.42	60	47.26	46.3	43.76	47.83	50	16.79	48	23	39	46.76	32.01
2.58	68	51.36	66.95	51.41	68.09	58.25	67.21	105.42	92.23	46.28	71	70.27	46	60.38	46.09	73.01	55.22	45.06	19	28.48	43	26	10.68	26.9	63	37.83	23.45	36.52	61.32	47	20.29	44	10	45	50.81	24.41
2.78	79	54.51	63.86	44.57	67.27	53.32	62.6	90.03	86.73	52	78	66.36	57	67.27	43.62	69.46	86.25	60.99	25	33.12	52	24	13.96	30.28	81	41.66	23.87	40.93	61.81	39	18.84	44	15	39	55.97	21.53
2.98	79	48.05	64.39	49.35	68.26	48.7	58.56	73.56	90.62	38.44	50	61.88	49	75.58	27.37	63.99	112.43	50.08	17	27.5	39	34	10.9	29.11	69	49.94	34.76	41.04	72.69	41	15.69	33	18	50	48.89	20.35
3.18	78	50.35	74.24	46.12	67.41	62.02	63.49	80.97	79.06	33.2	58	56.27	52	61.86	45.82	52.63	125.2	55.3	18	33.5	35	33	11.65	30.83	44	60.93	50.31	48.94	71.69	37	14.67	44	23	26	37.05	23.89
3.37	73	39.06	75.67	46.74	67.13	78.76	71.54	98.01	83.59	42.41	32	66.33	71	72.79	41.26	52.36	112.13	51.79	19	38.92	30	30	11.06	32.88	59	55.14	44.99	40.35	64.32	49	11.34	47	30	39	29.12	26.48
3.57	85	46.35	70.94	43.6	66.89	85.76	78.33	102.05	104.15	50.2	42	55.17	68	86.5	30.54	49.3	86.07	57.82	16	48.69	24	32	13.18	28.75	66	39.71	33.02	29.7	56.43	82	12.54	35	23	26	30.65	29.08
3.77	85	56.73	70.34	40.52	65.3	75.75	71.48	67.83	71.57	53.95	54	58	59	112.94	51.18	46.59	70.35	51.56	15	47.07	28	28	14.26	26.77	59	31.81	35.76	31.67	47.49	68	13.52	44	28	20	42.38	34.54
3.97	99	63.27	79.32	36.33	58.91	81.31	49.8	65.78	61.47	54.13	59	62.68	69	98.45	39.98	39.72	67.01	38.78	15	39.64	32	31	20.72	31.56	36	30.79	34.81	44.16	50.5	50	17.08	45	21	27	33.56	37.74
4.17	88	70.82	79.31	50.73	47.44	91.59	48.11	61.95	58.51	45.74	73	66.27	61	81.22	54.13	40.59	73.45	38.86	20	43.96	17	25	22.26	33.02	28	25.45	27.65	45.93	57.25	46	16.6	62	18	27	36.99	25.4
4.37	75	45.58	47.28	57.96	37.62	59.65	45.71	48.88	41.52	36.87	32	61.24	33	65.53	46.26	59.57	67.67	21.55	5	30.77	7	35	16.29	20.8	29	19.17	20.17	34.06	40.67	30	13.89	50	19	17	38.37	24.97
4.56	46	17.72	19.08	53.26	27.31	27.6	30.11	31.9	25.59	19.33	11	39.54	16	41.86	20.74	60.67	39.14	15.53	4	15.8	10	27	7.53	9.63	22	11.07	5.97	14.89	19.89	7	5.01	32	8	6	32.14	12.53
4.76	26	7.43	7.92	21.94	18.31	13.71	14.89	25.58	13.69	12.21	15	16.87	8	24.32	10.31	33.46	16.37	9.6	3	7.89	4	16	4.21	5.63	10	6.47	6.03	7.42	9.92	5	3.03	9	6	3	19.01	6.09
4.96	9	7.05	5.91	10.54	11.28	9.01	7.95	32.59	8.38	10.23	8	8.31	5	14.76	4.68	15.7	10.22	4.78	2	4.95	3	13	3.74	7.86	5	4.4	2.9	4.3	6.87	4	3.71	7	3	4	17.35	5.68
5.16	12	6.53	5.24	6.9	8.13	7.49	5.73	37.69	5.5	9.46	8	5.72	8	11.03	2.61	6.36	7.17	3.37	1	4.65	4	16	3.54	8.62	5	4.79	3.89	2.33	4.35	3	2.3	5	3	3	18.27	5.26
5.36	7	3.86	3.55	4.35	7.23	5.14	8.17	40.85	5.39	7.4	6	6.76	8	8.71	2.88	4.07	5.29	3.3	1	3.76	3	17	5.99	7.07	2	3.42	4.42	3.13	4.51	3	2.36	6	4	4	8.2	3.87
5.56	8	3.44	5.34	3.96	6.71	5.05	8.19	33.34	4.06	6.53	11	14.3	6	6.79	3.67	4.4	3.55	2.44	2	1.3	2	9	5.36	6.71	5	5.42	4.09	3.2	6.16	4	2.44	4	2	3	8.02	3.79
5.76	14	3.68	5.83	3.39	6.36	6.12	6.02	31.8	4	4.99	8	16.73	8	7.1	4.27	4.07	2.62	2.55	2	2.21	3	12	8.55	9.32	2	3.87	5.49	2.02	2.66	2	3.2	8	1	3	13.23	3.12
5.95	9	5.36	4.69	3.53	6.91	6.03	5.5	32.53	5.91	3.84	4	14.57	4	5.42	3.38	6.97	3.37	3.28	1	1.81	6	10	12.41	8.76	2	2.76	2.77	2.24	2.23	4	4.37	4	2	4	14.93	2.98
6.15	12	3.48	3.93	3.7	7.29	2.87	4.04	26.34	5.76	3.37	4	9.29	2	4.5	2.35	10.53	3.46	2.6	2	1.46	4	6	14.96	7.33	1	2.86	3.14	3.59	3.53	3	2.3	5	3	4	13.41	3.25
6.35	11	4.21	3.76	3.92	8.04	2.26	5.02	16	4.98	4.02	5	8.47	3	4.87	3.43	23.47	3.29	4.17	1	2.25	2	4	11.06	6.22	4	3.26	4.5	2.59	4.05	3	2.5	4	1	7	13.63	3.55
6.55	5	4	4	4	8.69	2	5	12.12	3	5	1	8	8	3	5	28	4	7	1	2	3	7	7	6	1	5	4	2	6	2	1	6	2	2	14	3
