# Supplementary material for: Loss of the extracellular matrix protein Perlecan disrupts axonal and synaptic stability during Drosophila development
Source: eLife. 2023 Jun 27;12:RP88273. doi: 10.7554/eLife.88273 (PMC10328508; doi:10.7554/eLife.88273)
Supplement: Figure 2—figure supplement 1—source data 1. [file elife-88273-fig2-figsupp1-data1.xlsx]

## Sheet: Figure 2S1B
Number of boutons		Descriptive statistics			Unpaired t test
Control	trolDf/trol		Control	trolDf/trol	Table Analyzed	# HRP + GluR3+ boutons
17	16	Number of values	14	20
24	18				Column B	trolDf/trol
17	16	Minimum	17	5	vs.	vs.
17	22	25% Percentile	17.75	10	Column A	Control
20	19	Median	20.5	15.5
22	15	75% Percentile	22.25	19.75	Unpaired t test
20	7	Maximum	24	28	P value	0.0048
18	5				P value summary	**
22	22	Mean	20.43	15.05	Significantly different (P < 0.05)?	Yes
21	23	Std. Deviation	2.533	6.27	One- or two-tailed P value?	Two-tailed
24	14	Std. Error of Mean	0.6771	1.402	t, df	t=3.030, df=32
23	28
22	20	Lower 95% CI	18.97	12.12	How big is the difference?
19	13	Upper 95% CI	21.89	17.98	Mean of column A	20.43
	17				Mean of column B	15.05
	10				Difference between means (B - A) ± SEM	-5.379 ± 1.775
	10				95% confidence interval	-8.994 to -1.763
	11				R squared (eta squared)	0.2229
	5
	10				F test to compare variances
					F, DFn, Dfd	6.126, 19, 13
					P value	0.0018
					P value summary	**
					Significantly different (P < 0.05)?	Yes
					Data analyzed
					Sample size, column A	14
					Sample size, column B	20

## Sheet: Figure 2S1C
% NMJs w footprints
Control	trolDf/trol
0	50

## Sheet: Figure 2S1E
Number of boutons									Descriptive Statistics										Ordinary one-way ANOVA						Multiple Comparisons
RNAi Ctl A3	Driver Ctl A3	tub>RNAi A3	RNAi Ctl A4	Driver Ctl A4	tub>RNAi A4	RNAi Ctl A5	Driver Ctl A5	tub>RNAi A5		RNAi Ctl A3	Driver Ctl A3	tub>RNAi A3	RNAi Ctl A4	Driver Ctl A4	tub>RNAi A4	RNAi Ctl A5	Driver Ctl A5	tub>RNAi A5	Table Analyzed	Bouton #					Number of families	1
32	25	19	28	23	2	32	31	2	Number of values	12	12	12	12	11	12	12	12	12	Data sets analyzed	A-I					Number of comparisons per family	6
33	24	28	24	24	27	26	30	1																	Alpha	0.05
17	31	6	17	26	9	28	25	2	Minimum	17	21	2	17	23	0	17	21	0	ANOVA summary
24	32	15	29	26	13	27	35	8	25% Percentile	22.5	23.25	4	23.25	23	2	25.25	25.75	1.25	F	36.01					Šídák's multiple comparisons test	Mean Diff.	95.00% CI of diff.	Below threshold?	Summary	Adjusted P Value
30	21	3	36	26	3	28	22	1	Median	26.5	27	6.5	27.5	26	2.5	27.5	30.5	2	P value	<0.0001					RNAi Ctl A3 vs. Driver Ctl A3	-1.167	-7.853 to 5.520	No	ns	0.9978	A-B
27	23	4	36	23	0	30	28	0	75% Percentile	31.5	31.75	14.5	33.5	26	8.75	29	35	7	P value summary	****					RNAi Ctl A3 vs. tub>RNAi A3	17.25	10.56 to 23.94	Yes	****	<0.0001	A-C
22	38	13	26	24	8	17	30	7	Maximum	35	38	28	36	28	27	32	50	20	Significant diff. among means (P < 0.05)?	Yes					RNAi Ctl A4 vs. Driver Ctl A4	2.152	-4.685 to 8.988	No	ns	0.9534	D-E
24	29	7	19	28	2	21	21	20											R squared	0.7462					RNAi Ctl A4 vs. tub>RNAi A4	21	14.31 to 27.69	Yes	****	<0.0001	D-F
35	36	9	23	26	2	29	39	2	Mean	26.75	27.92	9.5	27.33	25.18	6.333	26.58	31.58	4.667							RNAi Ctl A5 vs. Driver Ctl A5	-5	-11.69 to 1.686	No	ns	0.2527	G-H
21	24	4	27	28	0	27	50	7	Std. Deviation	5.413	5.485	7.88	6.184	1.888	7.691	4.078	7.891	5.516	Brown-Forsythe test						RNAi Ctl A5 vs.tub>RNAi A5	21.92	15.23 to 28.60	Yes	****	<0.0001	G-I
30	23	4	28	23	2	29	35	4	Std. Error of Mean	1.562	1.583	2.275	1.785	0.5692	2.22	1.177	2.278	1.592	F (DFn, DFd)	1.060 (8, 98)
26	29	2	35		8	25	33	2											P value	0.3973					Test details	Mean 1	Mean 2	Mean Diff.	SE of diff.	n1	n2	t	DF
									Lower 95% CI	23.31	24.43	4.493	23.4	23.91	1.447	23.99	26.57	1.162	P value summary	ns					RNAi Ctl A3 vs. Driver Ctl A3	26.75	27.92	-1.167	2.49	12	12	0.4685	98
									Upper 95% CI	30.19	31.4	14.51	31.26	26.45	11.22	29.17	36.6	8.171	Are SDs significantly different (P < 0.05)?	No					RNAi Ctl A3 vs. tub>RNAi A3	26.75	9.5	17.25	2.49	12	12	6.928	98
																									RNAi Ctl A4 vs. Driver Ctl A4	27.33	25.18	2.152	2.546	12	11	0.8451	98
																			Bartlett's test						RNAi Ctl A4 vs. tub>RNAi A4	27.33	6.333	21	2.49	12	12	8.434	98
																			Bartlett's statistic (corrected)	22.03					RNAi Ctl A5 vs. Driver Ctl A5	26.58	31.58	-5	2.49	12	12	2.008	98
																			P value	0.0049					RNAi Ctl A5 vs.tub>RNAi A5	26.58	4.667	21.92	2.49	12	12	8.802	98
																			P value summary	**
																			Are SDs significantly different (P < 0.05)?	Yes
																			ANOVA table	SS	DF	MS	F (DFn, DFd)	P value
																			Treatment (between columns)	10716	8	1339	F (8, 98) = 36.01	P<0.0001
																			Residual (within columns)	3646	98	37.2
																			Total	14362	106
																			Data summary
																			Number of treatments (columns)	9
																			Number of values (total)	107

## Sheet: Figure 2S1F
% NMJs with footprints
RNAi Ctl A3	Driver Ctl A3	tub>RNAi A3	RNAi Ctl A4	Driver Ctl A4	tub>RNAi A4	RNAi Ctl A5	Driver Ctl A5	tub>RNAi A5
0	0	66.67	0	0	91.67	0	0	91.67
