# Supplementary material for: Loss of the extracellular matrix protein Perlecan disrupts axonal and synaptic stability during Drosophila development
Source: eLife. 2023 Jun 27;12:RP88273. doi: 10.7554/eLife.88273 (PMC10328508; doi:10.7554/eLife.88273)
Supplement: Figure 2—figure supplement 2—source data 1. [file elife-88273-fig2-figsupp2-data1.xlsx]

## Sheet: Figure 2S2B
Number of boutons						Descriptive statistics							Ordinary one-way ANOVA						Multiple Comparisons
Control A3	Control A4	Control A5	trol A3	trol A4	trol A5		Control A3	Control A4	Control A5	trol A3	trol A4	trol A5	Table Analyzed	# Is boutons					Number of families	1
32	20	9	13	4	17	Number of values	10	10	12	9	12	7	Data sets analyzed	A-F					Number of comparisons per family	3
37	13	22	10	13	4														Alpha	0.05
17	19	21	13	6	13	Minimum	8	5	9	6	2	1	ANOVA summary
22	24	28	6	9	13	25% Percentile	16.5	9.75	12.25	9	4	3	F	7.83					Šídák's multiple comparisons test	Mean Diff.	95.00% CI of diff.	Below threshold?	Summary	Adjusted P Value
28	11	26	8	9	3	Median	23	16	20	13	7.5	5	P value	<0.0001					Control v trol A3	11.86	4.176 to 19.53	Yes	**	0.0011	A-D
15	12	13	12	13	1	75% Percentile	29	21	23.5	13.5	13	13	P value summary	****					Control v trol A4	8	0.8436 to 15.16	Yes	*	0.0238	B-E
8	5	20	13	2	5	Maximum	37	35	28	14	18	17	Significant diff. among means (P < 0.05)?	Yes					Control v trol A5	10.33	2.384 to 18.28	Yes	**	0.0068	C-F
28	6	16	14	17									R squared	0.4203
22	35	9	14	3		Mean	23.3	16.5	18.33	11.44	8.5	8							Test details	Mean 1	Mean 2	Mean Diff.	SE of diff.	n1	n2	t	DF
24	20	12		18		Std. Deviation	8.525	9.034	6.457	2.833	5.584	6.191	Brown-Forsythe test						Control v trol A3	23.3	11.44	11.86	3.117	10	9	3.804	54
		24		4		Std. Error of Mean	2.696	2.857	1.864	0.9444	1.612	2.34	F (DFn, DFd)	1.784 (5, 54)					Control v trol A4	16.5	8.5	8	2.904	10	12	2.755	54
		20		4									P value	0.1317					Control v trol A5	18.33	8	10.33	3.226	12	7	3.203	54
						Lower 95% CI	17.2	10.04	14.23	9.267	4.952	2.274	P value summary	ns
						Upper 95% CI	29.4	22.96	22.44	13.62	12.05	13.73	Are SDs significantly different (P < 0.05)?	No
													Bartlett's test
													Bartlett's statistic (corrected)	10.67
													P value	0.0583
													P value summary	ns
													Are SDs significantly different (P < 0.05)?	No
													ANOVA table	SS	DF	MS	F (DFn, DFd)	P value
													Treatment (between columns)	1801	5	360.2	F (5, 54) = 7.830	P<0.0001
													Residual (within columns)	2484	54	46.01
													Total	4286	59
													Data summary
													Number of treatments (columns)	6
													Number of values (total)	60

## Sheet: Figure 2S2C
% synapses w severe retraction
Control A3	Control A4	Control A5	trol A3	trol A4	trol A5
0	0	0	32	56	52
