# Supplementary material for: Loss of the extracellular matrix protein Perlecan disrupts axonal and synaptic stability during Drosophila development
Source: eLife. 2023 Jun 27;12:RP88273. doi: 10.7554/eLife.88273 (PMC10328508; doi:10.7554/eLife.88273)
Supplement: Figure 2—source data 1. [file elife-88273-fig2-data1.xlsx]

## Sheet: Figure 2B
Number of boutons						Descriptive statistics							Ordinary one-way ANOVA						Multiple Comparisons
Control A3	Control A4	Control A5	trol A3	trol A4	trol A5		Control A3	Control A4	Control A5	trol A3	trol A4	trol A5
20	12	14	2	15	14	Number of values	13	13	13	25	25	21	Table Analyzed	# Ib boutons					Number of families	1
21	14	15	19	21	21								Data sets analyzed	A-F					Number of comparisons per family	3
25	19	22	28	3	17	Minimum	15	12	14	2	1	1							Alpha	0.05
19	24	22	16	18	4	25% Percentile	20	17	18	15	3.5	3	ANOVA summary
21	27	20	20	22	13	Median	21	23	22	20	12	5	F	11.56					Šídák's multiple comparisons test	Mean Diff.	95.00% CI of diff.	Below threshold?	Summary	Adjusted P Value
23	24	33	19	8	17	75% Percentile	26.5	24	26.5	22	20	14	P value	<0.0001					Control v trol A3	6.262	0.2633 to 12.26	Yes	*	0.0379	A-D
21	15	19	21	2	24	Maximum	40	27	33	30	27	24	P value summary	****					Control v trol A4	9.037	3.039 to 15.04	Yes	**	0.0012	B-E
22	22	17	19	1	4								Significant diff. among means (P < 0.05)?	Yes					Control v trol A5	13.17	6.982 to 19.36	Yes	****	<0.0001	C-F
30	27	27	4	21	14	Mean	23.46	21.08	22.08	17.2	12.04	8.905	R squared	0.3572
40	24	26	20	3	12	Std. Deviation	6.293	4.821	5.499	8.083	8.497	7.127							Test details	Mean 1	Mean 2	Mean Diff.	SE of diff.	n1	n2	t	DF
20	20	29	30	12	1	Std. Error of Mean	1.745	1.337	1.525	1.617	1.699	1.555	Brown-Forsythe test						Control v trol A3	23.46	17.2	6.262	2.472	13	25	2.533	104
28	23	22	21	14	3								F (DFn, DFd)	1.648 (5, 104)					Control v trol A4	21.08	12.04	9.037	2.472	13	25	3.656	104
15	23	21	26	2	3	Lower 95% CI	19.66	18.16	18.75	13.86	8.532	5.661	P value	0.1539					Control v trol A5	22.08	8.905	13.17	2.551	13	21	5.164	104
			2	27	5	Upper 95% CI	27.26	23.99	25.4	20.54	15.55	12.15	P value summary	ns
			22	9	1								Are SDs significantly different (P < 0.05)?	No
			23	4	3
			23	22	5								Bartlett's test
			14	19	12								Bartlett's statistic (corrected)	6.872
			22	27	2								P value	0.2303
			16	9	11								P value summary	ns
			20	2	1								Are SDs significantly different (P < 0.05)?	No
			16	4
			3	17									ANOVA table	SS	DF	MS	F (DFn, DFd)	P value
			20	5									Treatment (between columns)	3019	5	603.8	F (5, 104) = 11.56	P<0.0001
			4	14									Residual (within columns)	5434	104	52.25
													Total	8453	109
													Data summary
													Number of treatments (columns)	6
													Number of values (total)	110

## Sheet: Figure 2C
% NMJs w footprints
Control A3	Control A4	Control A5	trol A3	trol A4	trol A5
7.69	7.69	0	48	76	71

## Sheet: Figure 2D
% NMJs w severe retraction
Control A3	Control A4	Control A5	trol A3	trol A4	trol A5
0	0	0	20	44	57
