# Supplementary material for: Loss of the extracellular matrix protein Perlecan disrupts axonal and synaptic stability during Drosophila development
Source: eLife. 2023 Jun 27;12:RP88273. doi: 10.7554/eLife.88273 (PMC10328508; doi:10.7554/eLife.88273)
Supplement: Figure 3—source data 1. [file elife-88273-fig3-data1.xlsx]

## Sheet: Figure 3B
Number of boutons			Descriptive statistics				Ordinary one-way ANOVA						Multiple comparisons
Control	trol	trol, sggCA		Control	trol	trol, sggCA	Table Analyzed	# type I boutons					Number of families	1
39	20	30	Number of values	11	14	11	Data sets analyzed	A-C					Number of comparisons per family	3
42	26	28											Alpha	0.05
49	40	36	Minimum	20	17	13	ANOVA summary
55	54	48	25% Percentile	35	20	20	F	6.139					Tukey's multiple comparisons test	Mean Diff.	95.00% CI of diff.	Below threshold?	Summary	Adjusted P Value
41	35	13	Median	42	28.5	28	P value	0.0054					Control vs. trol	18.81	2.925 to 34.68	Yes	*	0.0174	A-B
87	29	28	75% Percentile	55	40	36	P value summary	**					Control vs. trol, sggCA	21.91	5.104 to 38.71	Yes	**	0.0083	A-C
99	20	45	Maximum	99	54	48	Significant diff. among means (P < 0.05)?	Yes					trol vs. trol, sggCA	3.104	-12.78 to 18.98	No	ns	0.8814	B-C
49	26	23					R squared	0.2712
20	28	16	Mean	50.09	31.29	28.18							Test details	Mean 1	Mean 2	Mean Diff.	SE of diff.	n1	n2	q	DF
35	32	20	Std. Deviation	23.27	11.96	11.13	Brown-Forsythe test						Control vs. trol	50.09	31.29	18.81	6.471	11	14	4.109	33
35	18	23	Std. Error of Mean	7.015	3.198	3.357	F (DFn, DFd)	1.143 (2, 33)					Control vs. trol, sggCA	50.09	28.18	21.91	6.849	11	11	4.524	33
	17						P value	0.3313					trol vs. trol, sggCA	31.29	28.18	3.104	6.471	14	11	0.6783	33
	53		Lower 95% CI	34.46	24.38	20.7	P value summary	ns
	40		Upper 95% CI	65.72	38.19	35.66	Are SDs significantly different (P < 0.05)?	No
							Bartlett's test
							Bartlett's statistic (corrected)	7.277
							P value	0.0263
							P value summary	*
							Are SDs significantly different (P < 0.05)?	Yes
							ANOVA table	SS	DF	MS	F (DFn, DFd)	P value
							Treatment (between columns)	3167	2	1584	F (2, 33) = 6.139	P=0.0054
							Residual (within columns)	8513	33	258
							Total	11681	35
							Data summary
							Number of treatments (columns)	3
							Number of values (total)	36

## Sheet: Figure 3C
% NMJs with footprints
Control	trol	trol, sggCA
9.09091	100	90.9091
