# Supplementary material for: Loss of the extracellular matrix protein Perlecan disrupts axonal and synaptic stability during Drosophila development
Source: eLife. 2023 Jun 27;12:RP88273. doi: 10.7554/eLife.88273 (PMC10328508; doi:10.7554/eLife.88273)
Supplement: Figure 4—source data 1. [file elife-88273-fig4-data1.xlsx]

## Sheet: Figure 4B
Presynaptic area (mm2)		Descriptive statistics			Unpaired t-test
Control	trol		Control	trol	Table Analyzed	m28 2nd instar entire NMJarea
172.12	173.43	Number of values	15	17
198.13	222.89				Column C	trol nmj area
156.18	251.5	Minimum	80.58	111.1	vs.	vs.
214.19	200.65	25% Percentile	151.4	144.6	Column B	ctrl nmj area
189.6	136.3	Median	172.1	154.4
80.58	195.28	75% Percentile	191.7	195.5	Unpaired t test
189.28	154.35	Maximum	214.2	251.5	P value	0.9991
152.71	149				P value summary	ns
210.91	123.81	Mean	168.5	168.5	Significantly different (P < 0.05)?	No
140.24	189.7	Std. Deviation	34.76	36.51	One- or two-tailed P value?	Two-tailed
151.38	153.38	Std. Error of Mean	8.974	8.855	t, df	t=0.001104, df=30
135.48	195.64
191.66	111.05	Lower 95% CI	149.3	149.8	How big is the difference?
158.92	163.63	Upper 95% CI	187.8	187.3	Mean of column B	168.5
186.29	150.24				Mean of column C	168.5
	153.95				Difference between means (C - B) ± SEM	0.01396 ± 12.65
	140.13				95% confidence interval	-25.81 to 25.84
					R squared (eta squared)	4.062e-08
					F test to compare variances
					F, DFn, Dfd	1.103, 16, 14
					P value	0.861
					P value summary	ns
					Significantly different (P < 0.05)?	No
					Data analyzed
					Sample size, column B	15
					Sample size, column C	17

## Sheet: Figure 4C
% Day 1 Area
Day	Ctrl Postsynaptic							Ctrl Presynaptic							trol Postsynaptic										trol Presynaptic
1	100	100	100	100	100	100	100	100	100	100	100	100	100	100	100	100	100	100	100	100	100	100	100	100	100	100	100	100	100	100	100	100	100	100
2	162.75	140.827	188.974	150.136	136.038	175.35	102.871	129.567	131.394	161.908	148.491	168.196	167.435	152.19	92.7489	85.3007	63.9357	70.5017	85.4539	65.6537	120.984	85.0783	74.0506	63.7285	94.768	77.7752	46.952	72.1965	69.998	60.7707	118.971	106.711	69.0556	17.7974
3	259.501	172.516	230.004	234.932	170.468	124.3	158.791	220.562	171.989	194.83	212.475	222.185	208.126	266.509	74.2645	66.5835	70.8434	51.3841	84.1472	26.4341	49.0593	43.0338	41.2658	28.7831	21.3952	54.4148	41.2451	57.1826	60.9257	25.5727	74.7059	69.8017	39.9663	16.8142
4			209.681	236.109		196.149	173.984			195.831	216.499		194.482	229.95	57.1471	75.1934	36.5462	73.6592	70.3748						29.0564	62.1321	28.1453	30.8156	17.8988

## Sheet: Figure 4F
eEJC Peak Current (nA)				Descriptive statistics					Unpaired t tests
Ctl	trol intact	trol retracted	trol		Ctl	trol intact	trol retracted	trol
36.8332	28.9296	0.371644	14.8917	Number of values	16	6	3	15	Column B	trol intact		Column C	trol retracted		Column D	trol
21.1937	33.7988	0.638896	18.4107						vs.	vs.		vs.	vs.		vs.	vs.
34.8165	75.2735	0.446976	14.0379	Minimum	19.99	28	0.3716	0.3611	Column A	Ctl		Column A	Ctl		Column A	Ctl
19.9861	73.8214		28.9296	25% Percentile	33.33	28.7	0.3716	0.6389
47.3755	52.7024		33.7988	Median	35.93	43.25	0.447	14.89	Unpaired t test			Unpaired t test			Unpaired t test
35.0289	27.9983		7.04015	75% Percentile	47.26	74.18	0.6389	33.8	P value	0.3189		P value	0.0001		P value	0.027
30.0076			8.64156	Maximum	69.02	75.27	0.6389	75.27	P value summary	ns		P value summary	***		P value summary	*
33.2451			75.2735						Significantly different (P < 0.05)?	No		Significantly different (P < 0.05)?	Yes		Significantly different (P < 0.05)?	Yes
33.5866			73.8214	Mean	40.8	48.75	0.4858	23.82	One- or two-tailed P value?	Two-tailed		One- or two-tailed P value?	Two-tailed		One- or two-tailed P value?	Two-tailed
46.9136			0.371644	Std. Deviation	13.89	21.88	0.1378	25.39	t, df	t=1.022, df=20		t, df	t=4.912, df=17		t, df	t=2.330, df=29
33.6077			0.638896	Std. Error of Mean	3.472	8.934	0.07956	6.556
46.6221			0.361099						How big is the difference?			How big is the difference?			How big is the difference?
54.0785			52.7024	Lower 95% CI	33.4	25.79	0.1435	9.764	Mean of column A	40.8		Mean of column A	40.8		Mean of column A	40.8
65.4757			0.446976	Upper 95% CI	48.2	71.72	0.8282	37.88	Mean of column B	48.75		Mean of column C	0.4858		Mean of column D	23.82
69.015			27.9983						Difference between means (B - A) ± SEM	7.957 ± 7.784		Difference between means (C - A) ± SEM	-40.31 ± 8.207		Difference between means (D - A) ± SEM	-16.97 ± 7.286
44.9704									95% confidence interval	-8.280 to 24.19		95% confidence interval	-57.63 to -23.00		95% confidence interval	-31.87 to -2.072
									R squared (eta squared)	0.04965		R squared (eta squared)	0.5866		R squared (eta squared)	0.1576
									F test to compare variances			F test to compare variances			F test to compare variances
									F, DFn, Dfd	2.483, 5, 15		F, DFn, Dfd	10157, 15, 2		F, DFn, Dfd	3.343, 14, 15
									P value	0.1578		P value	0.0002		P value	0.0268
									P value summary	ns		P value summary	***		P value summary	*
									Significantly different (P < 0.05)?	No		Significantly different (P < 0.05)?	Yes		Significantly different (P < 0.05)?	Yes
									Data analyzed			Data analyzed			Data analyzed
									Sample size, column A	16		Sample size, column A	16		Sample size, column A	16
									Sample size, column B	6		Sample size, column C	3		Sample size, column D	15
