# Supplementary material for: Loss of the extracellular matrix protein Perlecan disrupts axonal and synaptic stability during Drosophila development
Source: eLife. 2023 Jun 27;12:RP88273. doi: 10.7554/eLife.88273 (PMC10328508; doi:10.7554/eLife.88273)
Supplement: Figure 5—source data 1. [file elife-88273-fig5-data1.xlsx]

## Sheet: Figure 5B
Number of boutons									Descriptive Statistics				Ordinary one-way ANOVAs						Multiple Comparisons
Ctl	All cells	Neuron	N+M	Glia	FB	FB 2	Hemo	Hemo + FB	Neuron										Neuron
23.25	2	19	37	27	11	18	26	24		RNAi Ctl	Driver Ctl	C155>RNAi	Table Analyzed	Neuron					Number of families	1
21.2143	27	17	21	25	20	25	35	22	Number of values	12	12	12	Data sets analyzed	A-C					Number of comparisons per family	2
26.8333	9	21	27	24	22	8	22	29											Alpha	0.05
25.5714	13	22	34	22	20	28	19	23	Minimum	15	18	13	ANOVA summary
19.0769	3	26	28	19	28	26	31	31	25% Percentile	18.5	19.75	17	F	1.062					Dunnett's multiple comparisons test	Mean Diff.	95.00% CI of diff.	Below threshold?	Summary	Adjusted P Value	C-?
18.9286	0	25	30	13	25	24	24	23	Median	24	23	21.5	P value	0.3574					C155>RNAi vs. RNAi ctl	-2.083	-6.428 to 2.262	No	ns	0.4424	A	rnai only-6 larvae
23.1429	8	25	32	10	21	18	27	18	75% Percentile	27.25	28.5	25.75	P value summary	ns					C155>RNAi vs. Driver ctl	-2.583	-6.928 to 1.762	No	ns	0.2994	B	driver only-6 larvae
	2	26	26	16	18	21	27	19	Maximum	31	30	27	Significant diff. among means (P < 0.05)?	No
	2	17	24	26	13	24	24	20					R squared	0.06046					Test details	Mean 1	Mean 2	Mean Diff.	SE of diff.	n1	n2	q	DF
	0	13	20	23	11	24	25	27	Mean	23.25	23.75	21.17							C155>RNAi vs. RNAi ctl	21.17	23.25	-2.083	1.88	12	12	1.108	33
	2	16	26	14	17	40	26	22	Std. Deviation	4.845	4.245	4.707	Brown-Forsythe test						C155>RNAi vs. Driver ctl	21.17	23.75	-2.583	1.88	12	12	1.374	33
	8	27	21	24	19	35	25	31	Std. Error of Mean	1.399	1.226	1.359	F (DFn, DFd)	0.2538 (2, 33)
			26		22	21	25	21					P value	0.7773					N+M
			21		25	19	25	22	Lower 95% CI	20.17	21.05	18.18	P value summary	ns
			28		22		23	22	Upper 95% CI	26.33	26.45	24.16	Are SDs significantly different (P < 0.05)?	No					Number of families	1
			22		22		19	21											Number of comparisons per family	2
Neuron									N+M				Bartlett's test						Alpha	0.05
RNAi Ctl	Driver Ctl	C155>RNAi								RNAi Ctl	Driver Ctl	C155, mef2>RNAi	Bartlett's statistic (corrected)	0.1994
24	18	19							Number of values	14	14	16	P value	0.9051					Dunnett's multiple comparisons test	Mean Diff.	95.00% CI of diff.	Below threshold?	Summary	Adjusted P Value	C-?
24	22	17											P value summary	ns					C155, meft2>RNAi vs. RNAi ctl	5.223	1.369 to 9.078	Yes	**	0.0066	A	rnai only-7 larvae
31	24	21							Minimum	10	16	20	Are SDs significantly different (P < 0.05)?	No					C155, mef2>RNAi vs. Driver ctl	3.009	-0.8457 to 6.864	No	ns	0.1437	B	driver only-7 larvae
22	30	22							25% Percentile	18.75	20.75	21.25
20	18	26							Median	22	22.5	26	ANOVA table	SS	DF	MS	F (DFn, DFd)	P value	Test details	Mean 1	Mean 2	Mean Diff.	SE of diff.	n1	n2	q	DF
15	23	25							75% Percentile	24.25	25.25	29.5	Treatment (between columns)	45.06	2	22.53	F (2, 33) = 1.062	P=0.3574	C155, meft2>RNAi vs. RNAi ctl	26.44	21.21	5.223	1.68	16	14	3.11	41
25	23	25							Maximum	27	32	37	Residual (within columns)	700.2	33	21.22			C155, mef2>RNAi vs. Driver ctl	26.44	23.43	3.009	1.68	16	14	1.791	41
25	29	26											Total	745.2	35
29	19	17							Mean	21.21	23.43	26.44							Glia
18	29	13							Std. Deviation	4.228	4.45	4.993	Data summary
28	27	16							Std. Error of Mean	1.13	1.189	1.248	Number of treatments (columns)	3					Number of families	1
18	23	27											Number of values (total)	36					Number of comparisons per family	2
									Lower 95% CI	18.77	20.86	23.78							Alpha	0.05
N+M									Upper 95% CI	23.66	26	29.1
RNAi Ctl	Driver Ctl	C155, mef2>RNAi											Table Analyzed	Neuron + Muscle					Dunnett's multiple comparisons test	Mean Diff.	95.00% CI of diff.	Below threshold?	Summary	Adjusted P Value	C-?
25	25	37							Glia				Data sets analyzed	A-C					repo>RNAi vs. RNAi ctl	-6.583	-11.52 to -1.645	Yes	**	0.0078	A	rnai only-6 larvae
18	22	21								RNAi Ctl	Driver Ctl	repo>RNAi							repo>RNAi vs. Driver ctl	-3.536	-8.294 to 1.223	No	ns	0.1666	B	driver only-7 larvae
21	23	27							Number of values	12	14	12	ANOVA summary
25	32	34											F	4.909					Test details	Mean 1	Mean 2	Mean Diff.	SE of diff.	n1	n2	q	DF
10	26	28							Minimum	20	15	10	P value	0.0123					repo>RNAi vs. RNAi ctl	20.25	26.83	-6.583	2.145	12	12	3.069	35
20	32	30							25% Percentile	23.5	19	14.5	P value summary	*					repo>RNAi vs. Driver ctl	20.25	23.79	-3.536	2.067	12	14	1.711	35
22	19	32							Median	26.5	24	22.5	Significant diff. among means (P < 0.05)?	Yes
22	21	26							75% Percentile	28.75	28.25	24.75	R squared	0.1932					FB
24	22	24							Maximum	38	33	27
19	22	20											Brown-Forsythe test						Number of families	1
18	20	26							Mean	26.83	23.79	20.25	F (DFn, DFd)	0.3342 (2, 41)					Number of comparisons per family	2
27	23	21							Std. Deviation	4.764	5.265	5.691	P value	0.7178					Alpha	0.05
24	25	26							Std. Error of Mean	1.375	1.407	1.643	P value summary	ns
22	16	21											Are SDs significantly different (P < 0.05)?	No					Dunnett's multiple comparisons test	Mean Diff.	95.00% CI of diff.	Below threshold?	Summary	Adjusted P Value	C-?
		28							Lower 95% CI	23.81	20.75	16.63							ppl>RNAi vs. RNAi ctl	-5.821	-9.472 to -2.171	Yes	**	0.0014	A	rnai only-7 larvae
		22							Upper 95% CI	29.86	26.83	23.87	Bartlett's test						ppl>RNAi vs. Driver ctl	-6.464	-10.12 to -2.813	Yes	***	0.0004	B	driver only-7 larvae
													Bartlett's statistic (corrected)	0.4026
Glia									FB				P value	0.8177					Test details	Mean 1	Mean 2	Mean Diff.	SE of diff.	n1	n2	q	DF
RNAi Ctl	Driver Ctl	repo>RNAi								RNAi Ctl	Driver Ctl	ppl>RNAi	P value summary	ns					ppl>RNAi vs. RNAi ctl	19.75	25.57	-5.821	1.591	16	14	3.659	41
27	26	27							Number of values	14	14	16	Are SDs significantly different (P < 0.05)?	No					ppl>RNAi vs. Driver ctl	19.75	26.21	-6.464	1.591	16	14	4.063	41
25	19	25
22	33	24							Minimum	14	21	11	ANOVA table	SS	DF	MS	F (DFn, DFd)	P value	FB2
27	30	22							25% Percentile	24	24	17.25	Treatment (between columns)	206.8	2	103.4	F (2, 41) = 4.909	P=0.0123
26	27	19							Median	25.5	26	20.5	Residual (within columns)	863.7	41	21.07			Number of families	1
32	19	13							75% Percentile	29	28.5	22	Total	1071	43				Number of comparisons per family	2
38	29	10							Maximum	33	31	28							Alpha	0.05
23	28	16											Data summary
28	20	26							Mean	25.57	26.21	19.75	Number of treatments (columns)	3					Dunnett's multiple comparisons test	Mean Diff.	95.00% CI of diff.	Below threshold?	Summary	Adjusted P Value	C-?
25	19	23							Std. Deviation	4.91	2.86	4.865	Number of values (total)	44					Lsp2>RNAi vs. RNAi ctl	4.566	-0.3736 to 9.505	No	ns	0.0731	A	rnai only-7 larvae
29	23	14							Std. Error of Mean	1.312	0.7644	1.216							Lsp2>RNAi vs. Driver ctl	-1.429	-6.276 to 3.419	No	ns	0.7249	B	driver only-7 larvae
20	25	24
	15								Lower 95% CI	22.74	24.56	17.16	Table Analyzed	Glia					Test details	Mean 1	Mean 2	Mean Diff.	SE of diff.	n1	n2	q	DF
	20								Upper 95% CI	28.41	27.87	22.34	Data sets analyzed	A-C					Lsp2>RNAi vs. RNAi ctl	23.64	19.08	4.566	2.149	14	13	2.125	38
																			Lsp2>RNAi vs. Driver ctl	23.64	25.07	-1.429	2.109	14	14	0.6774	38
FB									FB2				ANOVA summary
RNAi Ctl	Driver Ctl	ppl>RNAi								RNAi Ctl	Driver Ctl	Lsp2>RNAi	F	4.719					Hemo
29	30	11							Number of values	13	14	14	P value	0.0153
25	26	20											P value summary	*					Number of families	1
33	24	22							Minimum	9	20	8	Significant diff. among means (P < 0.05)?	Yes					Number of comparisons per family	2
29	28	20							25% Percentile	15	23	18.75	R squared	0.2124					Alpha	0.05
24	23	28							Median	20	24.5	24
25	27	25							75% Percentile	23.5	27	26.5	Brown-Forsythe test						Dunnett's multiple comparisons test	Mean Diff.	95.00% CI of diff.	Below threshold?	Summary	Adjusted P Value	C-?
25	25	21							Maximum	27	30	40	F (DFn, DFd)	0.5817 (2, 35)					Hml>RNAi vs. RNAi ctl	6.259	2.702 to 9.816	Yes	***	0.0005	A	rnai only-7 larvae
27	30	18											P value	0.5643					Hml>RNAi vs. Driver ctl	-0.8125	-4.369 to 2.744	No	ns	0.8242	B	driver only-7 larvae
26	27	13							Mean	19.08	25.07	23.64	P value summary	ns
31	26	11							Std. Deviation	5.09	2.841	7.682	Are SDs significantly different (P < 0.05)?	No					Test details	Mean 1	Mean 2	Mean Diff.	SE of diff.	n1	n2	q	DF
18	21	17							Std. Error of Mean	1.412	0.7593	2.053							Hml>RNAi vs. RNAi ctl	25.19	18.93	6.259	1.55	16	14	4.038	41
14	31	19											Bartlett's test						Hml>RNAi vs. Driver ctl	25.19	26	-0.8125	1.55	16	14	0.5242	41
24	25	22							Lower 95% CI	16	23.43	19.21	Bartlett's statistic (corrected)	0.3331
28	24	25							Upper 95% CI	22.15	26.71	28.08	P value	0.8466					Hemo + FB
		22											P value summary	ns
		22							Hemo				Are SDs significantly different (P < 0.05)?	No					Number of families	1
										RNAi Ctl	Driver Ctl	Hml>RNAi							Number of comparisons per family	2
FB 2									Number of values	14	14	16	ANOVA table	SS	DF	MS	F (DFn, DFd)	P value	Alpha	0.05
RNAi Ctl	Driver Ctl	Lsp2>RNAi											Treatment (between columns)	260.6	2	130.3	F (2, 35) = 4.719	P=0.0153
20	26	18							Minimum	14	17	19	Residual (within columns)	966.3	35	27.61			Dunnett's multiple comparisons test	Mean Diff.	95.00% CI of diff.	Below threshold?	Summary	Adjusted P Value	C-?
21	27	25							25% Percentile	15.75	21	23.25	Total	1227	37				c564>RNAi vs. RNAi ctl	0.2946	-3.008 to 3.598	No	ns	0.9705	A	rnai only-7 larvae
14	20	8							Median	19.5	25.5	25							c564>RNAi vs. Driver ctl	-0.8125	-4.259 to 2.634	No	ns	0.8149	B	driver only-6 larvae
16	24	28							75% Percentile	22	31	26.75	Data summary
24	24	26							Maximum	23	34	35	Number of treatments (columns)	3					Test details	Mean 1	Mean 2	Mean Diff.	SE of diff.	n1	n2	q	DF
24	30	24											Number of values (total)	38					c564>RNAi vs. RNAi ctl	23.44	23.14	0.2946	1.435	16	14	0.2053	39
17	26	18							Mean	18.93	26	25.19							c564>RNAi vs. Driver ctl	23.44	24.25	-0.8125	1.498	16	12	0.5425	39
9	27	21							Std. Deviation	3.1	5.392	3.936
20	30	24							Std. Error of Mean	0.8285	1.441	0.9841	Table Analyzed	FB
13	24	24											Data sets analyzed	A-C
27	22	40							Lower 95% CI	17.14	22.89	23.09
20	25	35							Upper 95% CI	20.72	29.11	27.29	ANOVA summary
23	23	21											F	10.24
	23	19							Hemo + FB				P value	0.0002
										RNAi Ctl	Driver Ctl	c564>RNAi	P value summary	***
Hemo									Number of values	14	12	16	Significant diff. among means (P < 0.05)?	Yes
RNAi Ctl	Driver Ctl	Hml>RNAi											R squared	0.3332
22	27	26							Minimum	14	18	18
14	30	35							25% Percentile	19.75	21.5	21	Brown-Forsythe test
20	31	22							Median	24	25	22	F (DFn, DFd)	1.016 (2, 41)
23	21	19							75% Percentile	25.25	27	26.25	P value	0.3711
15	24	31							Maximum	30	28	31	P value summary	ns
19	34	24											Are SDs significantly different (P < 0.05)?	No
19	21	27							Mean	23.14	24.25	23.44
16	21	27							Std. Deviation	4.418	3.108	3.999	Bartlett's test
22	24	24							Std. Error of Mean	1.181	0.8972	0.9999	Bartlett's statistic (corrected)	4.203
20	17	25											P value	0.1223
18	31	26							Lower 95% CI	20.59	22.28	21.31	P value summary	ns
14	33	25							Upper 95% CI	25.69	26.22	25.57	Are SDs significantly different (P < 0.05)?	No
22	21	25
21	29	25											ANOVA table	SS	DF	MS	F (DFn, DFd)	P value
		23											Treatment (between columns)	387.1	2	193.6	F (2, 41) = 10.24	P=0.0002
		19											Residual (within columns)	774.8	41	18.9
													Total	1162	43
Hemo + FB
RNAi Ctl	Driver Ctl	c564>RNAi											Data summary
21	27	24											Number of treatments (columns)	3
30	28	22											Number of values (total)	44
24	27	29
24	26	23
19	27	31											Table Analyzed	FB 2
18	24	23											Data sets analyzed	A-C
25	18	18
26	23	19											ANOVA summary
24	23	20											F	4.205
24	26	27											P value	0.0224
20	21	22											P value summary	*
30	21	31											Significant diff. among means (P < 0.05)?	Yes
14		21											R squared	0.1812
25		22
		22											Brown-Forsythe test
		21											F (DFn, DFd)	2.147 (2, 38)
													P value	0.1308
													P value summary	ns
													Are SDs significantly different (P < 0.05)?	No
													Bartlett's test
													Bartlett's statistic (corrected)	11.05
													P value	0.004
													P value summary	**
													Are SDs significantly different (P < 0.05)?	Yes
													ANOVA table	SS	DF	MS	F (DFn, DFd)	P value
													Treatment (between columns)	261.8	2	130.9	F (2, 38) = 4.205	P=0.0224
													Residual (within columns)	1183	38	31.13
													Total	1445	40
													Data summary
													Number of treatments (columns)	3
													Number of values (total)	41
													Table Analyzed	Hemo
													Data sets analyzed	A-C
													ANOVA summary
													F	11.86
													P value	<0.0001
													P value summary	****
													Significant diff. among means (P < 0.05)?	Yes
													R squared	0.3666
													Brown-Forsythe test
													F (DFn, DFd)	3.876 (2, 41)
													P value	0.0287
													P value summary	*
													Are SDs significantly different (P < 0.05)?	Yes
													Bartlett's test
													Bartlett's statistic (corrected)	3.897
													P value	0.1425
													P value summary	ns
													Are SDs significantly different (P < 0.05)?	No
													ANOVA table	SS	DF	MS	F (DFn, DFd)	P value
													Treatment (between columns)	425.5	2	212.8	F (2, 41) = 11.86	P<0.0001
													Residual (within columns)	735.4	41	17.94
													Total	1161	43
													Data summary
													Number of treatments (columns)	3
													Number of values (total)	44
													Table Analyzed	Hemo + FB
													Data sets analyzed	A-C
													ANOVA summary
													F	0.2725
													P value	0.7629
													P value summary	ns
													Significant diff. among means (P < 0.05)?	No
													R squared	0.01378
													Brown-Forsythe test
													F (DFn, DFd)	0.1326 (2, 39)
													P value	0.8762
													P value summary	ns
													Are SDs significantly different (P < 0.05)?	No
													Bartlett's test
													Bartlett's statistic (corrected)	1.388
													P value	0.4995
													P value summary	ns
													Are SDs significantly different (P < 0.05)?	No
													ANOVA table	SS	DF	MS	F (DFn, DFd)	P value
													Treatment (between columns)	8.384	2	4.192	F (2, 39) = 0.2725	P=0.7629
													Residual (within columns)	599.9	39	15.38
													Total	608.3	41
													Data summary
													Number of treatments (columns)	3
													Number of values (total)	42

## Sheet: Figure 5D
Line profiles through axons
mm	Control Pcan											Neuron Pcan													N+M Pcan										Glia Pcan
0	21	11	51	9	16	12	9	19	12	13	15	11	16	16	41	41	17	19	87	34	12	57	40	23	13	21	12	9	15	34	15	10	16	16	15	33	58	34	23	39	35	27	6	20	71
0.198	19.58	9.92	33.54	12.3	24.5	10.01	7.74	18.58	14	14	18	23.32	13.74	16	36.53	40.53	19.24	21.54	78.78	28.75	12.33	60.09	53.17	31.81	14.56	26.19	12	11.19	11	31.68	15.94	12.07	16	14.28	15	41.91	34.41	37.46	29	43	40.22	20.35	7	12.56	87.12
0.397	20.09	10.67	28.73	13.41	21.61	10.8	7.48	14.49	16	16	17	35.46	15.12	17	34.01	42.1	19.31	24.27	74.94	26.62	14.47	45.98	81.32	35.39	18.78	28.93	13	12.91	12	29.96	14.85	14.15	23	11.56	14	43.13	26.68	41.67	26	47	41.46	21.55	9	13.64	106.24
0.595	21.61	11.48	19.74	13.9	18.85	8.6	8.74	13.48	21	17	31	45.59	16.23	17	36.8	42.85	18.86	23.49	76.92	23.81	21.21	40.45	104.35	52.46	21.68	29	12	12.89	11	32.47	13.47	14	17	12.22	19	56.21	23.72	44.53	15	69	39.74	18.84	9	16.32	129.27
0.794	24.88	12.63	21.8	18.88	23.01	10.96	11.24	13.86	30	24	56	41.44	26.09	21	39.67	44.94	23.45	29.59	94.65	38.01	41.5	40.19	91.25	67.26	21.52	34.62	8	14.09	13	41.7	17.92	16.8	16	15.53	29	76.85	33.05	38.17	15	72	48.54	20.82	19	18.93	125.1
0.992	40.04	24.98	38.1	21.68	51.47	26.07	21.8	18.96	52	40	81	44.87	49.5	32	40.2	50.44	41.95	41.49	107.78	58.93	74.44	54.97	66.62	66.73	29.46	53.57	17	18.17	24	62.5	28.85	19.59	26	34.2	50	108.09	67.29	42.13	26	50	69.2	32.95	41	34.41	117.13
1.19	55.87	51.42	78.86	36.89	74.18	53.24	38.7	39.31	59	61	81	44.01	64.4	75	43.56	65.32	67.09	46.37	97.39	73.67	66.5	64.22	57.21	59.56	56.4	59.6	32	35.23	55	93.05	51.62	24.18	49	60.51	56	133.79	124.61	59.23	48	41	68.9	65.07	52	51.57	136.84
1.39	57.07	72.14	80	60.72	73.66	53.38	49.58	64.23	43	76	69	41.45	64.1	79	45.64	66.05	96.71	50.94	90.36	73.43	51.89	59.37	59.64	50.73	74.43	61.38	39	47.93	55	99.16	71.95	36.23	63	72.71	57	134.02	125.31	58.67	70	36	62.19	96.75	59	54.68	147.61
1.59	52.71	58.36	53.25	63.88	66.33	41.38	47.55	46.52	37	60	70	48.71	64.11	65	42.75	65.74	124.74	48.97	89.68	76.47	48.34	55.89	70.95	40.36	83.7	54.85	46	49.22	51	78.79	76.98	44.57	77	66.22	60	116.48	96.14	50.6	76	31	65.16	98.32	53	56.49	145.12
1.79	59.31	49.72	53.57	73.28	63.04	47.26	43.71	38.11	33	54	61	51.46	55.34	66	43.54	63.6	114.97	44.12	92.93	80.47	61.8	53.31	73.83	32.77	84.67	48.11	46	50.54	55	72.45	71.95	37.96	91	65.59	54	83.09	83.13	39.89	63	34	75.08	79.79	58	57.4	133.38
1.98	64.27	49.32	50.98	62.16	61.13	46.03	51.84	42.2	33	60	58	49.03	57.99	67	44.05	61.59	87.93	40.56	102.43	90.92	62.25	53.15	64.68	26.46	86.49	44.68	40	52.14	59	75.12	55.64	30.85	70	67.92	57	58.04	80.65	37.9	50	44	85.3	73.37	64	51.94	121.23
2.18	73.43	50.54	64.36	55.77	61.19	44.79	51.98	44.71	36	58	55	56.64	55.41	70	45.47	64.35	71.79	39.94	101.08	90.65	67.17	52.39	67.48	26.92	82.06	43.72	41	49.64	57	76.59	58.3	24.47	62	79.88	56	40.17	78.59	39.08	42	49	83.19	76.52	61	56.34	95.15
2.38	66.67	52.68	67.95	59.52	58.39	34.29	47.95	46.95	41	58	58	60.14	53.83	87	53.23	71.18	62	42.31	90.94	88.92	69.55	52.42	66.72	29.12	88.4	44.22	44	47.95	61	77.37	60.98	22.98	57	69.86	53	38.42	80.97	44.4	45	50	84.7	93.71	62	51.53	90.05
2.58	59.4	51.17	67.44	66.7	58.64	28.61	48.11	53.49	47	63	53	50.38	57.97	82	54.27	79.49	58.37	49.95	84.25	82.37	71.75	52.76	74.59	28.6	74.03	43.7	43	53.57	50	84.71	65.71	21.21	69	68.07	60	53.79	102.01	67.1	52	46	84.14	102.15	52	49.17	78.55
2.78	58.96	45.63	65.04	79.17	56.09	29.57	48.21	39.64	44	71	70	56.04	58.92	38	56.63	87.85	57.3	61.53	81.94	73.72	73.08	53.65	78.93	32.61	60.15	46	29	65.02	31	95.66	72.8	23.87	64	58.48	68	90.97	107.27	69.61	38	41	83.06	97.76	53	51.28	66.8
2.98	59.65	49.11	63.16	80.86	32.4	28.54	29.52	21.81	29	72	70	55.73	55.19	23	40.71	107.22	49.58	78.02	91.58	69.58	78.69	55.96	77.46	31.55	69.7	59.4	16	50.73	19	108.83	86.75	27.76	37	41.4	57	124.27	107.98	63.84	23	43	79.41	81.16	49	38.96	69.05
3.18	46.7	46.9	34.53	60.13	16.92	18.75	17.29	17.05	22	68	72	54.58	55.89	23	30.02	114.47	27.45	80.56	91.46	72.52	74.17	62.09	71.63	24.53	70.02	67.94	14	31.1	18	111.59	63.91	29.31	23	31.15	35	112.88	118.29	80	24	54	79.69	51	37	27.15	70.81
3.37	35.87	21.95	16.76	30.56	11.72	10.27	9.81	17.23	12	44	58	61.43	42.08	24	29.54	94.49	19.83	61.44	57.98	49.93	43.52	54.15	70.22	16.14	48.62	51.27	13	19.02	19	99.59	30.08	35.6	15	27.24	17	81.55	104.07	120.58	17	36	67.66	32.25	16	19.1	72.52
3.57	34.64	13.71	11.82	16.75	10.12	6.19	6.86	12.74	10	23	27	52.37	27.57	30	29.32	69.54	19.07	50.28	39.95	29.71	20.55	44.06	50.41	12.08	32.11	33.82	17	15.61	19	71.6	19.81	42.18	18	19.34	15	53.64	78.82	121.25	11	26	47.22	20.7	13	15.8	79.16
3.77	35.38	11.94	11.29	12.57	11.11	4.5	6.09	9.38	14	16	11	28.07	17.1	28	24.51	54.57	18.62	46.15	33.44	29.87	14.12	36.08	26.01	12.13	24.14	31.47	17	17.73	18	52.18	18.22	31.85	24	13.7	15	33.19	51.87	62.6	9	21	34.4	15.46	15	20.31	82.44
3.97	30.8	12.97	12.86	12.82	11.56	5.84	6.36	8.77	18	16	9	18.16	14.41	20	22.24	49.01	23.22	40.41	33.69	28.96	13.45	33.9	21.98	12.59	19.16	35.62	17	16.33	13	41.99	14.94	18.77	17	12.67	15	27.97	31.65	37.46	9	29	27.22	15.15	7	26.02	77.88
4.17	34.88	14.19	13	10.5	12.52	6	6.03	10.52	13	15	11	10.76	12.55	24	26.54	51.86	22.92	39.32	40.76	27.17	11.38	33.02	15.17	12.04	16.27	32.4	16	17.07	12	31.01	14.04	11.11	18	15.9	18	23.77	22.21	32.34	17	25	28.91	11.36	8	21.12	56.53

## Sheet: Figure 5E
Line profiles through axons
mm	Ctl Hrp											Neuron Hrp													N+M Hrp										Glia Hrp
0	21	21	3	1.4	31	2	2	2	1	2	3	2	2	3	2	4	1	2	7	2	2	3	3	2	2	4	2	2	2	3	1	2	2	2	4	10	31	8	3	2	3	3	1	2	9
0.198	12.07	9.76	4.05	2.48	21.7	3	2.85	1.15	2	2	2	3.9	1.71	5	2	3.48	1.96	2.31	4.45	1.76	3.09	1.1	4	3.29	1.1	1.8	2	2.26	2	3.67	2.72	1.52	2	3.07	1	10.1	37.33	3.12	2	1	3	3.37	4	1.44	24.57
0.397	11.01	5.02	2.19	2.69	9.93	3	2.34	1.71	4	2	2	2.96	2.71	3	2.02	2.36	4.36	2.66	6.25	3.46	3.34	1.1	4.28	1.67	1.38	2.53	2	1.34	1	4.51	1.64	3.36	2	1.94	2	9.13	32.87	6.03	2	2	2.49	2.71	1	1.97	25.08
0.595	9.29	2.98	3.28	2.77	5.67	3	2.56	1.99	4	4	6	5.97	2.16	4	2.64	3.47	2.51	2.17	12.1	4.22	2.99	2.85	7.7	2.08	3.41	2	2	1.81	4	3.34	2.59	3.49	1	3.1	2	17.72	35.99	5.01	1	4	2.25	4.12	2	2	20.83
0.794	6.74	3.03	6.42	2.61	4.3	3.61	4.92	4.17	6	5	4	9.32	2.95	4	3.66	3.55	2.25	3.12	14.36	3.94	4.29	2.81	9.75	5	2.02	2.82	2	2.41	1	3.33	2.56	3.89	1	2.04	2	22.49	21.68	4.02	5	7	3.04	5.01	3	2.44	25.19
0.992	7.44	5.58	5.72	3.08	5	3.94	5.74	3.76	8	7	13	14.82	7.59	6	5.77	5.42	4.81	2.91	12.23	7.83	10.17	11.76	19.14	9.57	3.9	6.55	3	3.68	8	7.33	3.26	5.82	4	3.48	13	30.03	20.34	14.4	7	18	6.95	4.83	2	4.11	26.9
1.19	17.49	8.89	13.38	6.16	12.6	9.71	7.73	10.28	20	4	16	15.84	14.54	13	12.26	10.4	11.23	6.93	18.98	11.63	19.3	10.01	34.33	18.16	6.5	7.94	7	5.29	17	17.59	6.48	6.1	3	7.2	16	41.61	22.56	9.74	11	30	14.03	7.69	8	10.99	29.98
1.39	24.33	10.38	16.3	10.46	17.4	13.23	14.75	25.81	29	9	16	13.39	15.05	34	15.53	17.39	25.13	10.49	26.58	12.16	21.77	22.57	25.41	22.09	21.48	14.94	10	12.16	27	31.32	11.95	5.35	14	14.63	24	38.59	20.02	9.66	15	28	17.9	7.93	10	21.63	27.2
1.59	30.69	13.2	36.71	20.93	17.59	22.31	32.29	36.88	23	17	17	15.56	24.48	41	21.4	13.53	25.84	19.73	30.58	18.52	21.66	18.7	24.01	13.07	15.32	20.48	10	24.2	21	53.22	16.13	5.18	12	21.47	26	41.67	22.6	10.22	20	22	22.03	8.54	30	20.28	39.3
1.79	30.41	20.34	42.38	29.8	19.92	34.23	26.27	31.23	9	28	20	10.59	23.98	25	21.44	18.43	21.58	28.34	22.1	17.7	23.31	15.89	15.52	13.88	21.34	19.94	16	18.03	20	60.87	11.03	7.3	22	24.82	25	44.86	24.69	10.82	25	13	18.55	14.77	29	18.13	42.28
1.98	23.12	21.89	52.79	31.49	21.55	32.78	23.24	27.64	14	23	27	13.17	25.61	30	21.27	14.78	21.86	21.21	26.44	21.54	22.87	12.46	15.43	13.22	21.06	18.98	22	13.34	22	50.33	21.53	15.11	21	21.41	22	50.86	29.94	23.21	11	17	14.92	17.33	15	17.96	30.89
2.18	23.11	13.9	48.11	29.17	21.22	31.96	33.58	23.01	18	23	30	15.6	26.63	28	15.16	11.01	20.8	17.67	23.94	19.85	22.49	12.99	23.65	16.33	12.53	17.21	8	10.4	13	40.85	29.82	17.21	24	20.31	25	52.79	25.35	26.06	25	13	14.75	14.18	23	22.02	26
2.38	33.54	16.47	34.76	20.5	19.03	24.81	28.08	14.48	19	13	25	14.58	23.95	57	6.73	15.35	18.64	16.57	25.04	16.91	21.65	15.54	16.39	13.7	21.74	18.96	7	13.24	12	34.75	24.34	20.35	24	27.05	20	41.53	22.89	24.82	16	20	20.46	14.59	22	18.31	23.84
2.58	35.85	24.08	42.87	11.22	12.79	17.17	17.95	7.2	14	18	19	14.58	27.68	36	3.75	15.82	22.6	15.22	25.06	21.39	21.32	15.24	25.47	10.79	25.64	19.76	2	11.6	3	32.07	24.26	17.5	10	18.36	12	41.28	15.25	19.26	11	14	14.47	10.25	18	9.46	23.59
2.78	31.18	19.57	22.99	5.15	7.07	14.5	18.35	3.45	17	16	12	16.59	17.21	12	2.09	20.9	11.02	13.59	17.11	30.02	21.83	12.71	12.23	6.73	30	26.43	1	11.67	3	26.66	20.73	14.09	4	10.41	13	40.71	18.28	22.15	3	17	14.69	11.81	10	3.71	21.41
2.98	19.99	11.02	7.69	3.79	2.8	5.1	6.71	2.88	5	24	14	19.04	18.76	7	3.31	13.43	3.23	8.88	15.68	31.01	21.16	15.66	13.69	3.81	17.53	18.34	3	5.73	1	26.67	16.89	13.9	3	6.03	3	25.56	19.83	30.28	2	6	13.55	11.44	9	3.14	16.63
3.18	10.28	4.39	3.59	2.56	1.57	2.63	3.15	2.52	2	10	13	21.77	13.65	3	2.89	7.1	3.31	5.72	10.36	16.22	8.3	6.6	13.29	1.77	8.13	11.1	3	3.59	2	17.6	8.04	14.94	1	3.76	2	12.69	17.52	16.91	3	2	7.69	12.91	5	2.61	14.05
3.37	7.55	3.79	3.99	2	2.33	2.03	2.56	1.7	3	6	5	8.58	7.75	4	2.14	4.6	2.59	3.64	15.63	7.64	4.7	3.44	4.18	2.54	3.34	5.3	2	2.43	2	6.69	3.45	19.1	2	1.91	2	5.02	9.54	10.67	2	1	3.97	11.56	3	3.26	13.81
3.57	8.95	4.85	3.86	1.98	2.33	1.35	1.64	1.83	2	4	5	4.85	3.2	5	1.39	4.09	2.01	4.88	14.87	3.25	2.99	3.15	3.3	2.54	6.41	2.24	1	1.86	1	6.09	2.62	10.48	2	1.78	2	3	6.63	7.66	4	2	2.76	6.88	2	2.95	11.89
3.77	12.61	4.59	2.23	2.8	3.89	1.02	1.42	0.817	3	5	4	4.76	3.66	1	1	3.29	1.56	2.4	12.11	3.14	3.16	1.23	2.03	1.5	4.06	2.02	0	1.28	2	6.12	3.06	3.27	1	1.85	2	3.39	4.33	3.58	2	3	2.45	5.03	2	2.04	5.63
3.97	29.13	2.02	2.93	2.15	4	2.82	3.43	2.47	1	3	2	2.31	2.36	2	1.87	1.63	2.03	2.42	4.91	2.16	2.87	1.93	1.12	4	2.99	2.34	1	1.97	2	4.33	4.07	3.32	5	1.64	1	4.83	2.24	1.38	1	3	3.69	8.83	2	2.5	7.04
4.17	22.27	3.33	2.02	2	2.36	1.19	3.95	2.95	3	3	2	2.91	1.25	3	2.07	2.01	2.87	4.37	3.08	2.16	2.31	2.97	2.96	2.07	2.09	2.06	2	1.13	2	3.34	4.02	2.99	2	2.97	2	3.12	2.98	2.84	2	2	1.81	9.03	2	4.9	5.96

## Sheet: Figure 5F
Line profiles through boutons
mm	Ctl Pcan											Neuron Pcan														N+M Pcan												Glia Pcan
0	12	28	17	10	16	12	17	11	14	11	8	4	13	12	13	23	11	13	12	9	13	20	15	11	11	19	20	13	12	8	13	7	16	17	23	40	25	15	14	17	15	11	12	21	12	19	13	11	9
0.198	10.7	26.71	16	8	15.34	13	16.97	8	18.14	10	10.16	7.23	9	18.88	14	21.75	10	20.82	12	9	11.61	15	10.9	14	8.32	22	20	12	9	10	13.56	6.61	17	12	23	23	28.17	18.13	15.64	15.55	18.16	10	13	23.74	12	14.62	10.25	14	11.18
0.397	12.59	21.77	18	10	13.81	11	17.96	12	16.84	12	8.98	8.73	11	15.75	14	25.89	12	26.36	16	7	11.25	14	9.91	14	10.44	33	29	9	9	11	14.8	7.74	15	9	19	13	30.55	18.41	15.91	14.39	17.41	16	13	27.04	11	13.11	13.83	13	13.48
0.595	13.66	13.86	13	8	11.73	11	17.58	16	13.87	10	8.5	9.31	12	12.14	12	24.95	9	26.14	24	7	9.86	15	10.35	12	11.16	31	26	11	12	10	13.89	9.32	19	14	14	15	32.53	18.87	16.82	15.67	18.18	27	11	30.92	12	11.99	16.53	12	18.97
0.794	15.94	12.37	15	10	11.08	14	18.26	18	13.2	8	9.72	7.63	13	11.11	16	27.4	9	24.03	23	10	11.5	19	11.78	14	14.02	23	27	12	11	13	14.81	8.67	19	15	15	22	29.99	16.62	19.24	15.41	20.91	22	12	36.22	20	10.64	23.04	11	36.6
0.992	19.37	13.49	19	11	15.97	15	19.14	8	14.4	9	10.29	6.33	13	14.74	11	33.11	11	19.11	14	10	9.77	21	15.64	16	16.3	17	38	10	14	14	15.67	9.03	17	11	18	35	29.78	16.25	19.16	15.44	23.73	21	9	29.57	20	14.92	27.33	13	50.36
1.19	17.01	18.6	13	12	17.32	15	19.21	8	11.95	12	10.1	7.75	10	15.17	13	51.52	9	15.58	15	12	10.03	17	13.58	17	14.44	16	40	11	18	11	18.63	9.71	13	12	12	28	29.49	14.83	20.18	15.69	34.57	25	10	22.48	16	23.04	25.88	13	41.11
1.39	17.53	21.61	10	13	18.91	11	20.73	9	9.25	17	10.01	6.96	10	14.3	11	50.79	11	15.22	13	13	10.44	24	11.64	11	10.02	11	29	12	13	14	26.91	9.97	7	15	7	25	25.48	14.95	18.59	15.62	38.39	28	8	20.06	15	16.33	23.69	15	29.87
1.59	17.04	16.54	12	17	20.76	8	16.8	15	9.98	23	13.76	6.97	14	16.65	12	41.52	7	17.05	10	10	13.34	24	9.98	14	9.21	12	28	12	12	11	34.82	12	13	14	6	20	24.3	14.59	13.97	24.2	36.2	27	7	21.8	8	12.28	20.59	21	17.66
1.79	16.02	12.49	10	15	18.38	7	16.88	20	10.06	21	16.27	6.91	17	16.39	14	36.07	9	16.69	12	11	14.11	24	10.1	17	7.48	14	17	13	12	13	28.22	11.92	18	18	10	13	26.44	13.37	15.98	23.04	29.08	33	8	21.85	16	7.44	16.3	42	14.06
1.98	13.91	12.29	12	15	15.84	7	19.91	14	10.27	14	15.93	8.31	14	12.35	14	30.03	10	15.91	16	10	12.68	29	10.66	14	8.21	12	14	15	10	12	19.69	11.63	20	14	8	13	28.96	12.28	17.93	18.4	28.14	29	9	20.17	17	7.98	15.49	25	14.98
2.18	13.73	13.49	12	14	17.88	7	21.73	16	11.37	13	13.64	7.24	11	13.92	17	31.32	9	16.58	13	11	13.08	21	10.99	13	8.02	9	12	11	7	14	13.24	10.8	20	14	8	13	19.5	14.04	17.3	15.89	24.5	17	10	17.49	18	9.31	14.55	20	12.71
2.38	16.63	12.33	9	10	18.25	6	21.59	14	12.4	15	10.77	8.08	9	12.19	22	37.37	10	15.84	15	9	12.21	21	11.12	12	7.12	9	12	11	9	16	14.54	9.89	15	17	9	19	20.34	17.11	14.82	13.94	26.63	15	10	19.13	12	11.89	13.93	18	10.33
2.58	17.68	13.5	11	12	24.32	6	19.32	16	14.65	24	11.04	9.94	9	13.12	18	38.17	14	15.93	19	12	12.08	29	9.23	15	8.17	11	11	17	13	17	19.71	9.79	14	22	13	23	31.39	21.36	14.57	16.81	28.56	22	7	22.79	12	14.49	15.83	19	13.21
2.78	18.23	16.21	11	14	25.62	9	15.19	16	16.19	33	17.28	8.73	13	17.04	24	35.98	30	16	15	17	12.32	28	11.02	17	11.67	15	11	12	16	21	17.88	10.63	20	10	13	26	30.67	20.7	16.48	19.89	26.71	13	10	28.39	12	9.11	18.02	12	15.25
2.98	18.5	21.22	13	13	22.57	18	11.65	15	18.19	29	14.64	6.12	11	16.95	21	34.03	28	19.42	13	17	13.16	21	12.97	15	12.47	15	13	14	9	13	13.93	13.5	22	11	15	14	28.72	17.17	15.15	18.24	26.69	15	15	39.23	24	6.05	23.14	16	29.5
3.18	19.24	24.41	17	19	18.63	21	12.6	18	19.61	21	16.07	6.74	18	13.85	18	30.46	22	21.7	11	13	15.75	22	11.59	10	11.77	11	24	16	10	10	13.38	9.44	17	13	23	19	30.16	14.73	15.83	15.21	27.92	27	11	49.68	29	5.65	21.27	25	30.09
3.37	17.87	20.87	16	17	19.29	13	14.83	18	19.6	28	16.97	9.82	17	13.46	26	24.48	17	22.15	15	8	15.34	23	9.96	11	11.56	16	26	16	10	14	19.51	17.32	18	14	16	15	31.98	14.94	21.68	19.82	31.69	27	9	43.53	15	11.78	16.81	24	30.75
3.57	17.93	20.93	17	16	20.5	10	14.74	18	16.27	31	16.01	8.9	17	13.95	28	26.68	23	20.4	15	10	14.33	22	8.18	19	14.4	19	15	13	17	10	24.06	14.93	23	13	14	19	38.11	19.33	21.91	27.18	29.03	26	13	29.91	12	18.43	18.27	16	28.59
3.77	15.47	22.28	16	14	18.31	8	13.36	21	14.33	28	17.86	9.56	13	15.84	23	30.37	19	15.71	14	10	11.81	18	7.45	23	17.19	23	14	13	13	9	29.49	12.37	20	12	12	31	41.7	18.42	19.92	26.42	25.29	18	14	21.1	11	13.51	21.85	14	32.18
3.97	14.91	18.05	17	10	18.35	6	12.87	17	14.49	18	20.05	11.43	14	20.07	19	35.49	18	12.79	10	13	16.32	15	7.8	17	17.14	14	15	11	14	13	25.89	10.16	20	12	8	34	35.26	14.76	21.82	20.96	23.81	28	14	17.57	12	6.74	21.9	17	23.34
4.17	13.68	13.66	13	10	25.29	8	13.02	13	13.41	19	13.21	11.14	9	20.7	17	38.74	15	11.29	9	15	22.99	20	9.63	21	10.26	14	13	10	9	11	22.26	9.19	17	11	10	25	28.4	12.04	17.14	19.07	24.47	30	16	20.4	22	5.16	19.25	16	20.89
4.37	15.93	11.12	12	13	21.21	9	12.49	17	13.49	16	10.44	8.25	12	20.07	24	27.45	18	13.41	8	10	18.68	21	11.41	13	10.94	11	13	7	7	10	14.93	9.35	15	12	11	20	20.74	12.71	16.29	18.03	22.24	22	17	18.16	19	6.12	15.41	13	23.24
4.56	18.1	16.44	12	13	17.47	12	11.87	19	12.04	15	12.26	9.03	11	20.54	18	27.52	15	11.68	10	10	14.34	21	9.91	16	16.44	10	18	7	8	15	13.4	11.43	13	10	8	18	19.22	14.02	15.85	21.13	20.02	16	16	20.51	14	8.45	14.9	15	20.72
4.76	17.47	16.05	12	14	16.2	11	11.58	15	14.54	21	12.82	9	17	14.92	23	29.46	16	11.16	14	11	12.35	26	10.74	15	18.07	14	32	10	8	10	12.36	13.78	11	9	11	20	16.95	21.69	15.61	22.41	20.5	20	16	23.88	12	10.47	17.36	18	22.03
4.96	15.74	13.92	13	13	14.47	12	9.6	10	14.65	20	13	8.97	11	18.82	17	33.47	17	12.08	12	13	13.23	22	9.07	19	17.73	13	47	12	10	11	10.09	11.97	13	16	10	32	15.39	24.09	14.02	22.15	19.89	26	17	32.57	19	13.31	17.34	15	30.1
5.16	19.84	12.42	18	13	14	17	8.14	13	19.95	21	11.72	7.24	10	20.61	11	31.04	21	12.72	11	10	15.31	23	9.84	18	15.07	13	35	12	11	9	11.32	10.64	14	17	11	28	15.51	19.33	14.02	18.13	22.65	22	23	31.06	14	16.13	16.93	12	29.07
5.36	21.93	12.49	16	13	12.62	14	9.19	12	21.03	15	8.97	6.91	10	18.72	13	22.16	16	12.75	12	11	12.52	21	10.98	9	12.82	16	16	11	11	10	14.34	10.24	19	18	12	15	19.25	16.01	12.82	16.83	21.63	23	26	25.47	17	14.17	20.27	9	30.65
5.56	31.16	14.04	15	11	13.42	18	9.93	13	22.51	10	9.2	9.06	12	15.94	9	19.93	14	14.19	12	8	11.69	28	9.68	13	12.66	14	13	8	11	10	18.3	9.44	18	15	12	14	18.78	15.54	12.04	15.59	19.75	38	24	24.05	16	9.43	25.03	11	29.08
5.76	35.46	13.83	21	15	15.17	14	17.86	16	20.05	9	9.82	9.99	13	14.34	13	20.25	20	15.1	10	8	9.65	32	11.55	12	13.04	15	10	10	13	8	23.82	8.02	24	16	9	20	11.11	14.78	12.44	15.21	18.28	29	18	21.51	22	8.84	27.38	12	28.75
5.95	16.4	12.72	24	26	14.57	20	18.94	13	16.93	10	7.81	9.57	16	16.45	13	20.55	23	16.27	7	7	10.31	28	12.98	15	16.13	14	11	9	13	9	23.9	10.52	24	19	9	15	11.33	13.18	12.72	17.02	17.95	16	13	22.06	33	8.03	34.19	11	25.02
6.15	10.35	13.18	15	12	13.72	23	17.67	16	14.2	12	6.91	8.83	13	17.85	15	20.82	26	21.32	10	8	10.92	20	11.57	15	19.48	16	9	9	12	9	18.51	10.63	25	18	10	15	11.79	12.82	12.89	18.99	18.14	21	13	21.5	27	8.69	38.77	12	19.1
6.35	10.53	14.78	12	11	12.48	20	14.25	14	14.58	13	5.9	9.16	10	17.91	18	16.9	18	25.2	13	8	10	17	10.37	17	17.4	14	11	7	13	7	17.64	9.81	18	14	12	26	12.46	14.21	12.87	29.24	18.74	20	15	24.19	21	8.58	32.35	10	17.05

## Sheet: Figure 5G
Line profiles through boutons
mm	Ctl Hrp											Neuron Hrp														N+M Hrp												Glia Hrp
0	5	3	3	3	3	3	8	4	9	1	3	3	4	4	3	3	8	2	6	4	4	2	2	6	3	7	1	0	3	2	2	4	2	20	11	2	6	2	3	2	3	3	5	3	6	4	2	1	2
0.198	3.52	5.59	2	2	2.38	2	6.11	4	15.96	5	1.74	2.13	7	2.19	4	3.24	3	3.18	5	2	1.93	4	2.15	3	3.38	5	3	3	1	3	3.3	5.54	2	27	3	5	4.29	2.63	2.59	2.9	2.15	3	3	3	4	4.34	2.01	2	3.88
0.397	3.34	4.6	4	1	1.68	3	8.89	7	15.99	2	1.75	3.47	2	2	4	2.94	4	2.57	14	3	2.31	3	2	2	3.16	9	4	2	3	2	2.59	5.06	4	15	4	3	4.6	3.58	2.79	1.42	4.66	2	2	4.21	2	6.16	4.05	4	3.12
0.595	3.17	3.17	4	1	2	3	6.02	6	11.97	1	3.19	3.84	3	2	4	3.58	4	3.33	13	3	2.29	2	1.74	4	2.88	19	4	4	7	3	1.99	4.42	2	12	3	3	3.84	4.91	3.54	4.74	4.3	4	9	3.94	4	5.46	2.72	2	5.08
0.794	3.22	2.4	5	4	2.51	2	5.07	2	5.91	2	4.32	2.99	2	3.61	3	4.61	3	3.1	23	3	4.39	3	1.73	2	3.75	15	12	3	13	2	2.06	4.14	1	7	8	3	6.21	3.13	3.36	5.91	6.65	2	6	8.25	2	3.46	3.63	1	9.21
0.992	4.18	4.29	5	2	3.07	5	6.43	2	5.83	4	9.18	4.49	7	2.03	2	3.59	7	2.84	14	2	5.8	1	4.52	2	5.59	10	8	4	10	3	1.62	3.5	3	7	6	6	4.33	4.96	2.21	3.25	6.5	4	5	12.12	2	4.08	5.69	2	5.34
1.19	7.3	6.01	4	3	3.24	4	11.33	7	7.16	3	15.17	6.12	5	4.4	4	7.75	7	4.83	8	5	7.25	5	3.81	8	9.86	9	7	6	4	6	2.82	2.23	3	9	7	6	5.9	6.87	2.92	4.21	4.66	7	2	15.21	3	5.87	5.19	4	7.16
1.39	15.16	8.09	4	5	5.22	10	10.36	4	8.91	5	16.49	4.77	4	2.42	2	4.6	9	9.27	5	5	5.23	6	3.18	7	17.52	10	5	7	6	8	3.6	3.95	5	8	7	10	8.76	9.79	4.8	6.74	6.92	8	7	13.58	5	5.79	6.63	6	4.46
1.59	12.22	11.69	6	9	10.11	10	8.32	11	8.36	4	16.61	10.61	6	2.54	5	7.59	9	13.18	6	5	8.35	6	3.7	7	17.37	16	7	13	5	6	4.43	4.29	5	8	10	7	15.07	11.6	4.69	18.52	9.93	12	7	13.72	14	7.25	9.35	11	4.99
1.79	10.97	14	5	13	19.1	16	11.43	8	16.01	7	26.07	18.83	6	11.18	12	18.2	19	17.4	6	6	15.74	11	8.66	7	16.54	26	8	17	16	9	6.47	7.44	15	17	17	11	30.94	18.28	7.57	20.1	16.59	20	8	23.32	13	9.59	12.51	18	12.59
1.98	25.03	21.48	8	20	37.33	29	21.46	12	27.16	21	29.83	28.28	18	11.41	19	40.93	30	42.06	11	16	27.79	27	14.01	16	26.98	31	19	38	16	21	11.96	11.15	31	61	41	14	54.47	42.41	8.29	22.09	32.05	20	24	52.18	20	17.84	27.15	36	21.68
2.18	60.8	30.15	8	26	48.66	64	40.91	17	42.78	28	32.16	48.54	27	32.92	46	50.95	65	51.07	30	20	38.57	41	21.51	33	47.19	34	24	53	27	37	28.2	18.91	42	57	57	32	61.93	50.02	19.86	30.07	43.28	44	55	90.5	33	32.12	40.62	72	43.88
2.38	68.47	45.67	16	17	49.56	54	51.52	33	48.49	33	39.72	54.33	31	34.52	67	50.67	94	51.69	31	50	35.73	43	29.12	33	41.85	32	43	34	30	37	38.67	29.95	46	52	67	29	71.26	42.62	29.28	41.3	31.27	40	65	86.42	48	40.44	52.34	75	49.82
2.58	59.24	34.32	31	11	60.6	39	57.84	42	65.08	27	44.29	54.07	44	33.9	53	39.2	73	87.7	47	51	46.54	30	34.99	27	64.25	50	46	30	32	33	42.65	38.81	55	44	59	48	68.68	45.63	44.65	55.83	26.47	34	48	75.11	47	27.35	48.72	58	46.55
2.78	44.78	36.25	34	15	71.31	38	61.47	32	52.35	45	46.1	44.34	49	42.4	66	30.41	67	67.43	49	75	55.62	43	40.15	29	66.53	42	69	34	34	64	34.19	38.34	37	32	69	63	52.84	52.92	53.91	68.67	28.54	30	48	68.82	35	21.41	44.52	41	71.51
2.98	39.97	39.53	22	17	67.54	36	50.51	38	44.86	48	42.41	37.27	28	34.45	64	39.38	61	52.06	53	51	48.44	47	37.34	38	52.41	40	68	46	34	46	34.36	40.78	46	37	69	45	45.42	55.8	57.77	65.46	25.08	30	48	72.55	33	21.51	33.1	53	50.69
3.18	45.85	35.97	28	25	66.04	53	44.77	38	39.25	43	43.38	35.17	23	30.79	65	45.72	56	42.42	51	69	38.03	47	34.64	39	47.72	40	53	50	23	57	32.94	43.54	33	28	53	35	49.16	41.62	59.44	55.27	33.91	32	45	74.44	46	22.69	31.17	49	50.89
3.37	56.85	31.28	37	13	56.76	44	48.17	46	37.01	46	36.69	64.95	30	37.9	45	51.26	59	51.39	42	49	30.98	50	30.49	49	55.47	73	51	37	29	57	35.78	41.13	35	36	59	46	56.48	42.67	70.28	62.07	33.74	37	49	77.16	40	21.1	32.17	50	43.13
3.57	64.03	32.14	39	15	71.32	48	51.07	45	42.25	58	35.45	80.3	32	39.26	55	55.85	46	48.75	65	54	24.56	66	25.05	43	63.3	77	81	36	28	50	33.97	34.39	28	45	56	48	54.54	46.22	56.69	63.63	36.92	39	59	52.93	34	28.95	32.1	43	30.05
3.77	51.6	32.47	37	15	67.55	38	50.14	58	47.24	73	39.48	83.41	42	39.89	68	56.32	50	51.24	56	69	28.05	72	27.34	71	61.96	64	65	41	39	27	34.43	36.83	29	37	42	45	45.54	50.71	61.36	54.33	32.92	40	77	45.96	25	28.32	29.12	47	35.94
3.97	48.65	33.85	33	16	54.73	31	62.86	47	46.7	40	49.02	61.38	39	35.19	63	61.42	52	52.3	64	65	39.53	80	34.7	44	73.14	78	66	49	37	29	34.89	42.14	33	43	31	57	43.15	50.1	55.86	54.25	27.7	31	63	37.64	27	32.09	27.72	48	43.45
4.17	48.86	30.8	28	17	31.79	26	65.03	36	28.67	30	41.9	28.49	25	41.75	51	65.58	80	34.93	40	69	51.34	61	37.68	43	42.13	59	56	37	33	28	31.79	47.89	54	32	31	63	47.03	56.41	57.36	43.84	25.98	36	47	33.42	31	31.9	35.36	46	49.09
4.37	33.08	29.93	34	16	13.57	25	54.72	52	14.97	17	42.5	9.16	24	38.47	46	49.89	74	15.71	35	44	52.51	36	25.76	52	22.49	49	25	24	18	34	28.11	37.44	51	17	23	31	32.29	27.55	43.95	27.86	17.55	58	54	16.37	36	23.24	41.92	24	37.52
4.56	19.63	21.82	23	11	10.71	9	24.91	39	6.95	11	33.75	8.1	11	20.13	19	25.41	55	9.81	18	22	36.07	15	10.33	34	10.6	20	14	11	10	13	19.27	14.91	70	27	13	17	14.94	14.04	26.42	18.98	15.19	30	47	8.25	16	13.29	35.88	13	22.44
4.76	11.33	15.23	4	7	4.54	5	10.06	12	4.47	8	19.22	8.45	5	10.27	9	14.98	22	8.54	11	15	13.59	6	4.92	22	7.72	12	5	12	2	6	10	9.32	45	7	10	17	10.03	6.61	11.63	11.58	14.04	19	19	10.91	5	7.78	27.74	8	9.71
4.96	7.8	12.92	9	3	5.22	3	8.47	4	4.62	11	8.93	5.61	3	9.87	5	9.65	11	8.99	8	7	7.07	11	4.01	6	6.07	8	3	10	7	4	6.18	5.57	23	3	7	14	6.75	6.22	9.15	6.52	6.39	7	21	5.58	10	3.71	17.72	5	9.59
5.16	7.94	5.95	8	3	4.02	8	6.35	8	6.86	4	6.4	4.63	5	7.59	2	8.34	14	3.88	6	5	8.18	9	3.88	3	3.76	18	2	6	3	5	4.58	4.78	10	4	12	4	6.15	7.26	13.31	4.45	3.66	14	18	3.62	9	2.18	11.24	3	4.15
5.36	7.11	5.37	2	3	3.89	5	6.08	6	6.51	2	2.96	3	3	2.61	3	3.27	17	3.98	11	3	7.2	10	3.33	2	5.09	9	2	7	7	3	3.4	7.75	7	2	7	5	4.84	7.04	7.85	5.73	2.89	6	21	4.01	4	2.49	10.41	4	8.3
5.56	10.07	5.07	7	5	2.17	4	6.65	2	3.24	2	3.66	3	3	1.94	5	7.71	23	4.41	3	1	4.44	4	3.11	3	9.05	6	2	9	5	2	5.72	6.43	7	7	9	6	3.27	5.44	2.87	3.09	4.29	8	19	4.64	4	2.68	8.3	4	4.46
5.76	8.88	3.49	3	2	2.57	4	6.66	3	3.48	1	7.95	3.55	5	3.51	5	6.39	12	3.25	2	3	3.96	3	2.28	3	6.23	3	3	4	2	2	4.03	4.83	6	6	1	3	4.67	2.83	1.76	9.86	3.61	2	15	2.23	5	1.9	6.4	3	8.25
5.95	6.51	7.14	6	2	3.94	6	4.41	2	1.97	3	3.74	3.51	3	3.2	1	5.01	9	3.55	6	3	2.97	3	2.69	2	2.18	6	1	5	1	2	3.72	5.25	7	4	3	5	4.09	3.75	1.58	5.54	2.43	3	9	2.34	3	0.364	4.99	2	13.34
6.15	3.73	6.74	3	2	2	5	3.2	3	1.19	1	2.41	1.7	3	2.89	2	3.01	14	3.16	3	3	2.19	8	1.28	1	3.71	3	5	2	3	3	5.41	6.02	7	4	4	3	3.6	4.24	2.57	4.82	2.77	4	6	2.15	2	1.68	3.9	2	6.79
6.35	4.38	5.66	2	1	2	3	6.72	6	3.02	2	2.94	2.2	2	2.99	4	3.63	5	4.89	3	2	3.36	2	1.87	2	3	3	3	4	4	2	5.75	8.25	5	1	1	3	4.94	3.39	1.94	4.86	2.98	4	7	2.47	0	2.29	2.82	1	5.01
