# Supplementary material for: Loss of the extracellular matrix protein Perlecan disrupts axonal and synaptic stability during Drosophila development
Source: eLife. 2023 Jun 27;12:RP88273. doi: 10.7554/eLife.88273 (PMC10328508; doi:10.7554/eLife.88273)
Supplement: Figure 6—source data 1. [file elife-88273-fig6-data1.xlsx]

## Sheet: Figure 6B
Number of boutons		Descriptive statistics			Unpaired t test
trol	trol;MhcS1		trol	trol;MhcS1
22	5	Number of values	19	17	Table Analyzed	Data 1
31	14
10	10	Minimum	1	0	Column B	trol;MhcS1
10	5	25% Percentile	7	7	vs.	vs.
12	9	Median	9	12	Column A	trol
9	12	75% Percentile	12	16
2	0	Maximum	31	25	Unpaired t test
8	9				P value	0.5975
1	25	Mean	10.47	11.65	P value summary	ns
9	4	Std. Deviation	6.907	6.224	Significantly different (P < 0.05)?	No
7	15	Std. Error of Mean	1.585	1.51	One- or two-tailed P value?	Two-tailed
5	19				t, df	t=0.5330, df=34
7	10	Lower 95% CI	7.145	8.447
17	17	Upper 95% CI	13.8	14.85	How big is the difference?
8	12				Mean of column A	10.47
11	15				Mean of column B	11.65
11	17				Difference between means (B - A) ± SEM	1.173 ± 2.202
6					95% confidence interval	-3.301 to 5.648
13					R squared (eta squared)	0.008285
					F test to compare variances
					F, DFn, Dfd	1.231, 18, 16
					P value	0.6809
					P value summary	ns
					Significantly different (P < 0.05)?	No
					Data analyzed
					Sample size, column A	19
					Sample size, column B	17

## Sheet: Figure 6D
Line profiles through axon (average)
mm	Ctl Pcan	MhcS1 Pcan	Ctl Hrp	MhcS1 Hrp
0	30.9258	18.8	3.41667	3.1
0.198	31.4117	19.503	3.975	3.007
0.397	35.0142	22.7	3.38333	3.583
0.595	42.0858	29.431	3.415	4.099
0.794	52.1725	40.521	5.3075	5.749
0.992	66.3367	54.598	9.17167	9.885
1.19	83.0683	62.585	15.3533	16.383
1.39	90.0217	63.256	23.0067	23.254
1.59	90.9867	62.356	29.64	27.261
1.79	89.3442	68.689	30.0583	29.804
1.98	91.7783	72.352	30.175	31.028
2.18	92.3133	69.627	29.4425	33.51
2.38	88.4633	71.206	29.5467	34.75
2.58	87.8408	80.048	29.1617	29.054
2.78	86.8792	84.307	25.9608	20.663
2.98	81.935	75.831	16.6308	16.175
3.18	70.0225	62.154	11.2192	15.269
3.37	49.845	49.179	6.70833	11.272
3.57	40.6592	41.505	5.52833	9.807
3.77	34.4208	39.426	3.40583	7.871
3.97	33.52	40.796	2.615	6.673
4.17	29.9727	41.945	3.38667	5.181

## Sheet: Figure 6E
Line profiles through bouton (average)
mm	Ctl Pcan	MhcS1 Pcan	Ctl Hrp	MhcS1 Hrp
0	20.75	16.8	3.48583	3.8
0.198	19.1167	18.058	5.4275	3.849
0.397	19.475	18.762	5.57417	3.67
0.595	20.0942	20.175	5.13333	3.679
0.794	20.6175	19.175	5.62	4.212
0.992	22.4433	16.911	6.15583	3.718
1.19	25.1025	16.918	7.805	4.743
1.39	23.9083	16.012	9.82583	5.916
1.59	24.2633	15.072	19.6175	8.447
1.79	24.5367	14.293	35.1867	13.521
1.98	21.4192	13.671	50.2667	30.14
2.18	20	14.068	57.9875	50.579
2.38	20.0958	14.37	55.7358	60.567
2.58	20.9508	14.742	53.3442	59.876
2.78	23.2592	16.583	50.1108	65.012
2.98	22.1642	17.778	56.5617	58.958
3.18	22.5925	17.576	60.9683	49.187
3.37	24.1992	17.712	62.9417	52.998
3.57	25.2183	16.896	68.945	54.081
3.77	24.6042	14.16	67.315	54.159
3.97	20.9258	14.521	57.8117	52.84
4.17	19.4025	14.122	36.775	51.704
4.37	19.3225	12.935	18.1442	46.599
4.56	19.9317	13.166	10.5033	27.056
4.76	19.6383	14.037	7.49583	11.409
4.96	19.59	14.497	6.185	7.126
5.16	20.9858	15.363	5.12083	5.166
5.36	19.8542	16.539	4.1125	6.945
5.56	18.525	17.196	3.2875	7.58
5.76	18.1767	17.036	3.67333	5.871
5.95	18.4542	16.746	3.2875	4.876
6.15	18.0783	16.412	3.77583	3.303
6.35	20.49	15.789		3.617
		15.107		3.099
