# Supplementary material for: Loss of the extracellular matrix protein Perlecan disrupts axonal and synaptic stability during Drosophila development
Source: eLife. 2023 Jun 27;12:RP88273. doi: 10.7554/eLife.88273 (PMC10328508; doi:10.7554/eLife.88273)
Supplement: Figure 7—source data 1. [file elife-88273-fig7-data1.xlsx]

## Sheet: Figure 7B
% Control NMJ Area
		Segment 2
muscle 6/7		53.6189	59.3269	76.4074	73.4034	13.3198	89.3456	100.548
4		44.2432	44.6656	50.2405	91.0422	4.43795	72.9087	31.541
1		45.0575	80.4482	52.3427	83.5801	7.00357	104.687	79.6208

## Sheet: Figure 7C
% Control NMJ Area
		Segment 3
muscle 6/7		13.537	5.40092	16.6973	19.4441	7.6532	0	73.3768	34.7161	42.3693	10.3357	26.6682
4		15.3405	0	26.8279	14.6912	8.01837	0	61.5309	57.3476	34.1645	44.4486	18.4771
1		16.9274	7.16202	12.5803	9.89584	9.33732	0	73.237	69.9423	30.393	3.4793	22.8865
