# Supplementary material for: Loss of the extracellular matrix protein Perlecan disrupts axonal and synaptic stability during Drosophila development
Source: eLife. 2023 Jun 27;12:RP88273. doi: 10.7554/eLife.88273 (PMC10328508; doi:10.7554/eLife.88273)
Supplement: Figure 8—source data 1. [file elife-88273-fig8-data1.xlsx]

## Sheet: Figure 8C
Mean Vkg Intensity		Descriptive statistics			Unpaired t test
Control	trol		Control	trol
60.0355	41.1834	Number of values	11	18	Table Analyzed	Mean Vkg
37.9764	37.8829
56.6518	37.0764	Minimum	37.98	32.11	Column B	trol
55.6826	35.2944	25% Percentile	55.68	35.21	vs.	vs.
60.6492	34.947	Median	59.95	39.53	Column A	Control
59.9478	32.9297	75% Percentile	69.07	56.71
51.7096	32.1092	Maximum	94.96	59.76	Unpaired t test
56.7049	59.76				P value	0.0014
94.9581	34.9583	Mean	62	45.04	P value summary	**
78.667	36.9859	Std. Deviation	14.84	10.81	Significantly different (P < 0.05)?	Yes
69.0676	59.0605	Std. Error of Mean	4.476	2.549	One- or two-tailed P value?	Two-tailed
	55.9486				t, df	t=3.559, df=27
	58.4923	Lower 95% CI	52.03	39.66
	36.4047	Upper 95% CI	71.98	50.41	How big is the difference?
	58.7501				Mean of column A	62
	52.391				Mean of column B	45.04
	56.1202				Difference between means (B - A) ± SEM	-16.97 ± 4.768
	50.3716				95% confidence interval	-26.75 to -7.184
					R squared (eta squared)	0.3193
					F test to compare variances
					F, DFn, Dfd	1.884, 10, 17
					P value	0.2404
					P value summary	ns
					Significantly different (P < 0.05)?	No
					Data analyzed
					Sample size, column A	11
					Sample size, column B	18

## Sheet: Figure 8D
Ratio Mean Vkg Intensity/Mean Hrp Intensity		Descriptive statistics			Unpaired t-test
Control	trol		Control	trol
1.07591	0.61367	Number of values	11	18	Table Analyzed	Ratio of Vkg/Hrp
1.14594	0.826776
0.851523	0.64391	Minimum	0.8515	0.3346	Column B	trol
1.17598	0.358391	25% Percentile	0.9313	0.4521	vs.	vs.
1.31219	0.334581	Median	1.176	0.744	Column A	Control
1.21376	0.383037	75% Percentile	1.313	0.8515
1.64262	0.460413	Maximum	1.819	1.474	Unpaired t test
0.923081	0.714149				P value	0.0004
1.81947	0.427154	Mean	1.219	0.7402	P value summary	***
1.3133	0.667616	Std. Deviation	0.2984	0.3168	Significantly different (P < 0.05)?	Yes
0.931332	0.925859	Std. Error of Mean	0.08998	0.07467	One- or two-tailed P value?	Two-tailed
	0.798126				t, df	t=4.032, df=27
	0.784815	Lower 95% CI	1.018	0.5826
	0.773909	Upper 95% CI	1.419	0.8977	How big is the difference?
	1.39815				Mean of column A	1.219
	1.47414				Mean of column B	0.7402
	0.929912				Difference between means (B - A) ± SEM	-0.4785 ± 0.1187
	0.808273				95% confidence interval	-0.7220 to -0.2350
					R squared (eta squared)	0.3758
					F test to compare variances
					F, DFn, Dfd	1.127, 17, 10
					P value	0.8749
					P value summary	ns
					Significantly different (P < 0.05)?	No
					Data analyzed
					Sample size, column A	11
					Sample size, column B	18
