# Supplementary material for: Loss of the extracellular matrix protein Perlecan disrupts axonal and synaptic stability during Drosophila development
Source: eLife. 2023 Jun 27;12:RP88273. doi: 10.7554/eLife.88273 (PMC10328508; doi:10.7554/eLife.88273)
Supplement: Figure 9—source data 1. [file elife-88273-fig9-data1.xlsx]

## Sheet: Figure 9B
Mean Futsch intensity in individual axons			Descriptive statistics			Unpaired t test
Control	trol			Control	trol
51852.8	9551.96		Number of values	14	17	Table Analyzed	Futch near bundle exit
47995.4	10059.9
30219.8	10743.5		Minimum	19759	8259	Column E	trol
41479	11628.2		25% Percentile	29867	9480	vs.	vs.
19758.6	8259.33		Median	38203	10743	Column C	Control
20891.2	18171.3		75% Percentile	46089	12593
45453.6	15091.3		Maximum	51853	18171	Unpaired t test
39037.1	16104.4					P value	<0.0001
37369.8	12296.5		Mean	36725	11476	P value summary	****
39174.5	12807.8		Std. Deviation	10025	2786	Significantly different (P < 0.05)?	Yes
31544.3	11440.8		Std. Error of Mean	2679	675.7	One- or two-tailed P value?	Two-tailed
28809.2	12377.6					t, df	t=9.961, df=29
48782.2	8964.77		Lower 95% CI	30937	10043
31788.4	9761.98		Upper 95% CI	42514	12908	How big is the difference?
	9979.31					Mean of column C	36725
	9408.56					Mean of column E	11476
	8438.75					Difference between means (E - C) ± SEM	-25250 ± 2535
						95% confidence interval	-30434 to -20065
						R squared (eta squared)	0.7738
						F test to compare variances
						F, DFn, Dfd	12.95, 13, 16
						P value	<0.0001
						P value summary	****
						Significantly different (P < 0.05)?	Yes
						Data analyzed
						Sample size, column C	14
						Sample size, column E	17

## Sheet: Figure 9D
Futsch net #
Control	trol	trol	trol
Mature 3rd	2nd instar	Early 3rd	Mature 3rd
0	0	5	9
0	0	4	10
0	0	3	13
0	0	2	8
0	1	4	14
0	1	4	11
0		4	9
0		1	8
0			9
0
0

## Sheet: Figure 9G
Number of boutons			Descriptive statistics				Ordinary one-way ANOVA						Multiple comparison
dSarm RNAi	trol, vGlut-Gal4	trol, vGlut>RNAi		dSarm RNAi	trol, vGlut-Gal4	trol, vGlut>RNAi
17	0	18	Number of values	12	12	12	Table Analyzed	# Ib boutons					Number of families	1
17	0	1					Data sets analyzed	A-C					Number of comparisons per family	3
23	2	1	Minimum	15	0	0							Alpha	0.05
23	25	13	25% Percentile	17	1	0.25	ANOVA summary
19	15	0	Median	18.5	3	3.5	F	16.05					Tukey's multiple comparisons test	Mean Diff.	95.00% CI of diff.	Below threshold?	Summary	Adjusted P Value
18	3	6	75% Percentile	23.75	18	8.25	P value	<0.0001					dSarm RNAi vs. trol, vGlut-Gal4	12	5.124 to 18.88	Yes	***	0.0004	A-B
25	1	5	Maximum	25	25	18	P value summary	****					dSarm RNAi vs. trol, vGlut>RNAi	15	8.124 to 21.88	Yes	****	<0.0001	A-C
17	1	2					Significant diff. among means (P < 0.05)?	Yes					trol, vGlut-Gal4 vs. trol, vGlut>RNAi	3	-3.876 to 9.876	No	ns	0.5387	B-C
18	3	0	Mean	20.08	8.083	5.083	R squared	0.493
15	4	0	Std. Deviation	3.63	9.737	5.775							Test details	Mean 1	Mean 2	Mean Diff.	SE of diff.	n1	n2	q	DF
25	24	9	Std. Error of Mean	1.048	2.811	1.667	Brown-Forsythe test						dSarm RNAi vs. trol, vGlut-Gal4	20.08	8.083	12	2.802	12	12	6.056	33
24	19	6					F (DFn, DFd)	1.496 (2, 33)					dSarm RNAi vs. trol, vGlut>RNAi	20.08	5.083	15	2.802	12	12	7.57	33
			Lower 95% CI	17.78	1.897	1.414	P value	0.2389					trol, vGlut-Gal4 vs. trol, vGlut>RNAi	8.083	5.083	3	2.802	12	12	1.514	33
			Upper 95% CI	22.39	14.27	8.753	P value summary	ns
							Are SDs significantly different (P < 0.05)?	No
							Bartlett's test
							Bartlett's statistic (corrected)	9.73
							P value	0.0077
							P value summary	**
							Are SDs significantly different (P < 0.05)?	Yes
							ANOVA table	SS	DF	MS	F (DFn, DFd)	P value
							Treatment (between columns)	1512	2	756	F (2, 33) = 16.05	P<0.0001
							Residual (within columns)	1555	33	47.11
							Total	3067	35
							Data summary
							Number of treatments (columns)	3
							Number of values (total)	36

## Sheet: Figure 9H
% NMJs with footprints
dSarm RNAi	trol, vGlut-Gal4	trol, vGlut>RNAi
0	75	83.33
